# Supplementary material for: The acute effects of aerobic exercise on sleep in patients with depression: study protocol for a randomized controlled trial
Source: Springer Nature journal article supplement (doi:10.1186/s13063-019-3415-3), 2019-06-13
Supplement: MOESM3 [file 16807824]

# EASED trial - version 232.71

Printed on 22-11-2018 09:28:32 by Gavin Brupbacher

## 1. Days 0-2 - Screening

| Number | Question                                                                                                                                                                                                                                                                                       | Answers                                               |
|--------|------------------------------------------------------------------------------------------------------------------------------------------------------------------------------------------------------------------------------------------------------------------------------------------------|-------------------------------------------------------|
| 1.1    | Informed consent EASED<br><i>Field type:</i> Radiobutton<br><i>Variable name:</i> Consent_EASED<br><i>Field required:</i> Required<br><i>Option group name:</i> Yes/No                                                                                                                         | <input type="radio"/> Yes<br><input type="radio"/> No |
| 1.2    | General consent<br><i>Field type:</i> Radiobutton<br><i>Variable name:</i> Consent_General<br><i>Field required:</i> Required<br><i>Option group name:</i> Yes/No                                                                                                                              | <input type="radio"/> Yes<br><input type="radio"/> No |
| 1.3    | Psychosomatic in-patient<br><i>Field type:</i> Radiobutton<br><i>Variable name:</i> PS_Reha<br><i>Field required:</i> Not required<br><i>Option group name:</i> Yes/No                                                                                                                         | <input type="radio"/> Yes<br><input type="radio"/> No |
| 1.4    | Age<br><i>Field type:</i> Numeric field<br><i>Variable name:</i> Age<br><i>Field required:</i> Not required<br><i>Field min:</i> 18.00<br><i>Field max:</i> 100.00<br><i>Measurement Unit:</i> years                                                                                           | <input type="text"/> years                            |
| 1.5    | Primary diagnosis of depression<br><i>Notice shown if field's value is equal to Yes: 'Cave: main diagnosis may NOT be F32.3 or F33.3'</i><br><i>Field type:</i> Radiobutton<br><i>Variable name:</i> Prim_Diag_Depr<br><i>Field required:</i> Not required<br><i>Option group name:</i> Yes/No | <input type="radio"/> Yes<br><input type="radio"/> No |
| 1.6    | Use of hypnotics in last 2 weeks<br><i>Field type:</i> Radiobutton<br><i>Variable name:</i> Hypnotics<br><i>Field required:</i> Not required<br><i>Option group name:</i> Yes/No                                                                                                               | <input type="radio"/> Yes<br><input type="radio"/> No |
| 1.7    | Exercise contraindication<br><i>Field type:</i> Radiobutton<br><i>Variable name:</i> Exercise_contraindication<br><i>Field required:</i> Not required<br><i>Option group name:</i> Yes/No                                                                                                      | <input type="radio"/> Yes<br><input type="radio"/> No |

|        |                                                                                                                                                                                                                                                                                                                                                               |                                                       |
|--------|---------------------------------------------------------------------------------------------------------------------------------------------------------------------------------------------------------------------------------------------------------------------------------------------------------------------------------------------------------------|-------------------------------------------------------|
| 1.8    | Use of beta-blockers (with the exception of Carvedilol & Nebivolol)<br><i>Field type:</i> Radiobutton<br><i>Variable name:</i> Beta_blockers<br><i>Field required:</i> Not required<br><i>Option group name:</i> Yes/No                                                                                                                                       | <input type="radio"/> Yes<br><input type="radio"/> No |
| 1.9    | Use of opioids<br><i>Field type:</i> Radiobutton<br><i>Variable name:</i> Opioids<br><i>Field required:</i> Not required<br><i>Option group name:</i> Yes/No                                                                                                                                                                                                  | <input type="radio"/> Yes<br><input type="radio"/> No |
| 1.10   | History of epilepsy<br><i>Field type:</i> Radiobutton<br><i>Variable name:</i> Epilepsy<br><i>Field required:</i> Not required<br><i>Option group name:</i> Yes/No                                                                                                                                                                                            | <input type="radio"/> Yes<br><input type="radio"/> No |
| 1.11   | RLS screening questionnaire score<br><i>Field type:</i> Calculation<br><i>Variable name:</i> RLSSQ_score<br><i>Field required:</i> Not required<br><i>Field min:</i> 0.00<br><i>Field max:</i> 10.00                                                                                                                                                          |                                                       |
| 1.12   | Body mass index<br><i>Field type:</i> Numeric field<br><i>Variable name:</i> BMI<br><i>Field required:</i> Not required<br><i>Field min:</i> 0.00<br><i>Field max:</i> 50.00                                                                                                                                                                                  | <input type="text"/>                                  |
| 1.13   | Preliminary inclusion, pending oxygen desaturation index<br><i>Exclude patient if field's value is equal to Exclusion with message: 'The patient is excluded form the study'</i><br><i>Field type:</i> Calculation<br><i>Variable name:</i> Preliminary_inclusion<br><i>Field required:</i> Not required<br><i>Field min:</i> 0.00<br><i>Field max:</i> 50.00 |                                                       |
| 1.13.1 | <b><i>If 'Preliminary inclusion, pending oxygen desaturation index' is equal to 'Preliminary inclusion' answer this question:</i></b><br>Oxygen desaturation index, baseline<br><i>Field type:</i> Calculation<br><i>Variable name:</i> ODI_screening<br><i>Field required:</i> Not required<br><i>Field min:</i> 0.00<br><i>Field max:</i> 50.00             |                                                       |

1.13.2 ***If 'Preliminary inclusion, pending oxygen desaturation index' is equal to 'Preliminary inclusion' answer this question:***

Definitive inclusion

*Exclude patient if field's value is equal to Exclusion with message: 'This patient is excluded from the study'*

*Field type:* Calculation

*Variable name:* Definitive\_inclusion

*Field required:* Not required

*Field min:* 0.00

*Field max:* 50.00

## 2. Days 0-2 - Graded exercise test

| Number | Question                                                                                                                                                                                                                                                                                                                                                                                                                            | Answers                                                                                         |
|--------|-------------------------------------------------------------------------------------------------------------------------------------------------------------------------------------------------------------------------------------------------------------------------------------------------------------------------------------------------------------------------------------------------------------------------------------|-------------------------------------------------------------------------------------------------|
| 2.1    | Polar watch used for test<br>SM06: forschung@oberwaid.ch & Tadc93kW<br>SM07: gavin.brupbacher@oberwaid.ch & Loka75zY<br>V800 (Oberwaid) : sport@oberwaid.ch & OberwaidSport<br><br><i>Field type:</i> Dropdown<br><i>Variable name:</i> Polar_test<br><i>Field required:</i> Required<br><i>Field min:</i> 0.00<br><i>Field max:</i> 220.00<br><i>Measurement Unit:</i> beats per min<br><i>Option group name:</i> Polar watch name | <input type="radio"/> SM06<br><input type="radio"/> SM07<br><input type="radio"/> V800 Oberwaid |
| 2.2    | Watt at 80% of individual anaerobic threshold<br><i>Field type:</i> Numeric field<br><i>Variable name:</i> Watt_80IAS<br><i>Field required:</i> Required<br><i>Field min:</i> 0.00<br><i>Field max:</i> 400.00<br><i>Measurement Unit:</i> Watt                                                                                                                                                                                     | <input type="text"/> Watt                                                                       |
| 2.3    | Expected heart rate at 80% IAS<br><i>Field type:</i> Numeric field<br><i>Variable name:</i> Expected_HR_80IAS<br><i>Field required:</i> Required<br><i>Field min:</i> 40.00<br><i>Field max:</i> 220.00<br><i>Measurement Unit:</i> beats per min                                                                                                                                                                                   | <input type="text"/> beats per min                                                              |
| 2.4    | Expected rate of perceived exertion at 80% IAS<br><i>Field type:</i> Numeric field<br><i>Variable name:</i> Expected_RPE_80IAS<br><i>Field required:</i> Required<br><i>Field min:</i> 6.00<br><i>Field max:</i> 20.00                                                                                                                                                                                                              | <input type="text"/>                                                                            |
| 2.5    | Test_termination<br><i>Field type:</i> Radiobutton<br><i>Variable name:</i> Test_termination<br><i>Field required:</i> Not required<br><i>Field min:</i> 0.00<br><i>Field max:</i> 400.00<br><i>Measurement Unit:</i> Watt<br><i>Option group name:</i> Yes/No                                                                                                                                                                      | <input type="radio"/> Yes<br><input type="radio"/> No                                           |
| 2.5.1  | <b>If 'Test_termination' is equal to 'Yes' answer this question:</b><br>Reason for test termination<br><i>Field type:</i> Multiline Textfield<br><i>Variable name:</i> Test_termination_reason<br><i>Field required:</i> Not required                                                                                                                                                                                               | <input type="text"/>                                                                            |



### 3. Day 3 - Background variables

| Number | Question                                                                                                                                                                                                                                                                    | Answers |
|--------|-----------------------------------------------------------------------------------------------------------------------------------------------------------------------------------------------------------------------------------------------------------------------------|---------|
| 3.1    | Sex<br><i>Field type:</i> Calculation<br><i>Variable name:</i> Sex<br><i>Field required:</i> Not required                                                                                                                                                                   |         |
| 3.2    | Smoker status<br><i>Field type:</i> Calculation<br><i>Variable name:</i> Smoker_status<br><i>Field required:</i> Not required                                                                                                                                               |         |
| 3.2.1  | <b><i>If 'Smoker status' is equal to '1' answer this question:</i></b><br>Packyears of those who stopped smoking<br><i>Field type:</i> Calculation<br><i>Variable name:</i> Packyears_previous<br><i>Field required:</i> Not required<br><i>Measurement Unit:</i> packyears |         |
| 3.2.2  | <b><i>If 'Smoker status' is equal to '2' answer this question:</i></b><br>Packyears of current smokers<br><i>Field type:</i> Calculation<br><i>Variable name:</i> Packyears_current_1<br><i>Field required:</i> Not required<br><i>Measurement Unit:</i> packyears          |         |
| 3.3    | Alcohol consumption<br><i>Field type:</i> Calculation<br><i>Variable name:</i> Alcohol<br><i>Field required:</i> Not required                                                                                                                                               |         |
| 3.4    | Credibility<br><i>Field type:</i> Calculation<br><i>Variable name:</i> Credibility<br><i>Field required:</i> Not required                                                                                                                                                   |         |
| 3.5    | Expectancy<br><i>Field type:</i> Calculation<br><i>Variable name:</i> Expectancy<br><i>Field required:</i> Not required                                                                                                                                                     |         |

## 4. Day 3 - PHQ-9

| Number | Question                                                                                                                                                                                               | Answers |
|--------|--------------------------------------------------------------------------------------------------------------------------------------------------------------------------------------------------------|---------|
| 4.1    | Patient Health Questionnaire (PHQ-9) score<br><i>Field type:</i> Calculation<br><i>Variable name:</i> PHQ9<br><i>Field required:</i> Not required<br><i>Field min:</i> 0.00<br><i>Field max:</i> 27.00 |         |

## 5. Day 3 - HADS

| Number | Question                                                                                                                                                                                                                                   | Answers |
|--------|--------------------------------------------------------------------------------------------------------------------------------------------------------------------------------------------------------------------------------------------|---------|
| 5.1    | Hospital Anxiety & Depression Questionnaire (HADS) depression score<br><i>Field type:</i> Calculation<br><i>Variable name:</i> HADS_depression<br><i>Field required:</i> Not required<br><i>Field min:</i> 0.00<br><i>Field max:</i> 21.00 |         |
| 5.2    | Hospital Anxiety & Depression Questionnaire (HADS) anxiety score<br><i>Field type:</i> Calculation<br><i>Variable name:</i> HADS_anxiety<br><i>Field required:</i> Not required<br><i>Field min:</i> 0.00<br><i>Field max:</i> 21.00       |         |
| 5.3    | Hospital Anxiety & Depression Questionnaire (HADS) sum score<br><i>Field type:</i> Calculation<br><i>Variable name:</i> HADS_sum<br><i>Field required:</i> Not required<br><i>Field min:</i> 0.00<br><i>Field max:</i> 21.00               |         |



## 6. Day 3 - PSS-10

| Number | Question                                                                                                                                                                                                                | Answers |
|--------|-------------------------------------------------------------------------------------------------------------------------------------------------------------------------------------------------------------------------|---------|
| 6.1    | <p>Perceived Stress Scale (PSS-10)</p> <p><i>Field type:</i> Calculation</p> <p><i>Variable name:</i> PSS10</p> <p><i>Field required:</i> Not required</p> <p><i>Field min:</i> 0.00</p> <p><i>Field max:</i> 40.00</p> |         |

## 7. Day 3 - PHQ-15

| Number | Question                                                                                                                                                                                           | Answers |
|--------|----------------------------------------------------------------------------------------------------------------------------------------------------------------------------------------------------|---------|
| 7.1    | Patient Health Questionnaire (PHQ-15)<br><i>Field type:</i> Calculation<br><i>Variable name:</i> PHQ15<br><i>Field required:</i> Not required<br><i>Field min:</i> 0.00<br><i>Field max:</i> 30.00 |         |

## 8. Day 3 - CIRS

| Number | Question                                                                                                                                                                                                                      | Answers |
|--------|-------------------------------------------------------------------------------------------------------------------------------------------------------------------------------------------------------------------------------|---------|
| 8.1    | <p>Cumulative Illness Rating Scale (CIRS)</p> <p><i>Field type:</i> Calculation</p> <p><i>Variable name:</i> CIRS</p> <p><i>Field required:</i> Not required</p> <p><i>Field min:</i> 0.00</p> <p><i>Field max:</i> 56.00</p> |         |

## 9. Day 3 - ESS

| Number | Question                                                                                                                                                                                  | Answers |
|--------|-------------------------------------------------------------------------------------------------------------------------------------------------------------------------------------------|---------|
| 9.1    | Epworth Sleepiness Scale (ESS)<br><i>Field type:</i> Calculation<br><i>Variable name:</i> ESS<br><i>Field required:</i> Not required<br><i>Field min:</i> 0.00<br><i>Field max:</i> 24.00 |         |

## 10. Day 3 - PSQI

| Number | Question                                                                                                                                                                                          | Answers |
|--------|---------------------------------------------------------------------------------------------------------------------------------------------------------------------------------------------------|---------|
| 10.1   | PSQI component 1: subjective sleep quality<br><i>Field type:</i> Calculation<br><i>Variable name:</i> PSQI_comp_1<br><i>Field required:</i> Not required                                          |         |
| 10.2   | PSQI component 2: sleep latency<br><i>Field type:</i> Calculation<br><i>Variable name:</i> PSQI_comp_2<br><i>Field required:</i> Not required                                                     |         |
| 10.3   | PSQI component 3: sleep duration<br><i>Field type:</i> Calculation<br><i>Variable name:</i> PSQI_comp_3<br><i>Field required:</i> Not required                                                    |         |
| 10.4   | PSQI component 4 calculation<br><i>Field type:</i> Calculation<br><i>Variable name:</i> PSQI_comp_4calc<br><i>Field required:</i> Not required                                                    |         |
| 10.5   | PSQI component 4: sleep efficacy<br><i>Field type:</i> Calculation<br><i>Variable name:</i> PSQI_comp_4<br><i>Field required:</i> Not required                                                    |         |
| 10.6   | PSQI component 5 calculation<br><i>Field type:</i> Calculation<br><i>Variable name:</i> PSQI_comp_5calc<br><i>Field required:</i> Not required                                                    |         |
| 10.7   | PSQI component 5: sleep disturbances<br><i>Field type:</i> Calculation<br><i>Variable name:</i> PSQI_comp_5<br><i>Field required:</i> Not required                                                |         |
| 10.8   | PSQI component 6: use of sleeping medication<br><i>Field type:</i> Calculation<br><i>Variable name:</i> PSQI_comp_6<br><i>Field required:</i> Not required                                        |         |
| 10.9   | PSQI component 7: daytime dysfunction<br><i>Field type:</i> Calculation<br><i>Variable name:</i> PSQI_comp_7<br><i>Field required:</i> Not required                                               |         |
| 10.10  | Pittsburgh Sleep Quality index (PSQI)<br><i>Field type:</i> Calculation<br><i>Variable name:</i> PSQI<br><i>Field required:</i> Not required<br><i>Field min:</i> 0.00<br><i>Field max:</i> 21.00 |         |



# 11. Day 3 - DBAS-16

| Number | Question                                                                                                                                                                                                                                        | Answers |
|--------|-------------------------------------------------------------------------------------------------------------------------------------------------------------------------------------------------------------------------------------------------|---------|
| 11.1   | Dysfunctional beliefs & attitudes about sleep scale (DBAS-16) consequences<br><i>Field type:</i> Calculation<br><i>Variable name:</i> DBAS16_cons<br><i>Field required:</i> Not required<br><i>Field min:</i> 0.00<br><i>Field max:</i> 10.00   |         |
| 11.2   | Dysfunctional beliefs & attitudes about sleep scale (DBAS-16) worry<br><i>Field type:</i> Calculation<br><i>Variable name:</i> DBAS16_worry<br><i>Field required:</i> Not required<br><i>Field min:</i> 0.00<br><i>Field max:</i> 10.00         |         |
| 11.3   | Dysfunctional beliefs & attitudes about sleep scale (DBAS-16) expectations<br><i>Field type:</i> Calculation<br><i>Variable name:</i> DBAS16_expect<br><i>Field required:</i> Not required<br><i>Field min:</i> 0.00<br><i>Field max:</i> 10.00 |         |
| 11.4   | Dysfunctional beliefs & attitudes about sleep scale (DBAS-16) medication<br><i>Field type:</i> Calculation<br><i>Variable name:</i> DBAS16_med<br><i>Field required:</i> Not required<br><i>Field min:</i> 0.00<br><i>Field max:</i> 10.00      |         |
| 11.5   | Dysfunctional beliefs & attitudes about sleep scale (DBAS-16) sum score<br><i>Field type:</i> Calculation<br><i>Variable name:</i> DBAS16_sum<br><i>Field required:</i> Not required<br><i>Field min:</i> 0.00<br><i>Field max:</i> 10.00       |         |

## 12. Day 3 - MEQ

| Number | Question                                                                                                                                                                                                                           | Answers |
|--------|------------------------------------------------------------------------------------------------------------------------------------------------------------------------------------------------------------------------------------|---------|
| 12.1   | <p>Morningness-Eveningness Questionnaire (MEQ)</p> <p><i>Field type:</i> Calculation</p> <p><i>Variable name:</i> MEQ</p> <p><i>Field required:</i> Not required</p> <p><i>Field min:</i> 16.00</p> <p><i>Field max:</i> 86.00</p> |         |



# 13. Day 3 - FIRST

| Number | Question                                                                                                                                                 | Answers |
|--------|----------------------------------------------------------------------------------------------------------------------------------------------------------|---------|
| 13.1   | Ford Insomnia Response to Stress sum score<br><i>Field type:</i> Calculation<br><i>Variable name:</i> FIRST_score<br><i>Field required:</i> Not required |         |

## 14. Day 3 - Blood pressure

| Number | Question                                                                                                                                                                                                                                                            | Answers                   |
|--------|---------------------------------------------------------------------------------------------------------------------------------------------------------------------------------------------------------------------------------------------------------------------|---------------------------|
| 14.1   | Systolic blood pressure day 3, measurement 1<br><i>Field type:</i> Numeric field<br><i>Variable name:</i> Syst_BP_day_3_1<br><i>Field required:</i> Required<br><i>Field min:</i> 50.00<br><i>Field max:</i> 240.00<br><i>Measurement Unit:</i> mmHg                | <input type="text"/> mmHg |
| 14.2   | Diastolic blood pressure day 3, measurement 1<br><i>Field type:</i> Numeric field<br><i>Variable name:</i> Dia_BP_day_3_1<br><i>Field required:</i> Required<br><i>Field min:</i> 20.00<br><i>Field max:</i> 170.00<br><i>Measurement Unit:</i> mmHg                | <input type="text"/> mmHg |
| 14.3   | Systolic blood pressure day 3, measurement 2<br><i>Field type:</i> Numeric field<br><i>Variable name:</i> Syst_BP_day_3_2<br><i>Field required:</i> Required<br><i>Field min:</i> 50.00<br><i>Field max:</i> 240.00<br><i>Measurement Unit:</i> mmHg                | <input type="text"/> mmHg |
| 14.4   | Diastolic blood pressure day 3, measurement 2<br><i>Field type:</i> Numeric field<br><i>Variable name:</i> Dia_BP_day_3_2<br><i>Field required:</i> Required<br><i>Field min:</i> 20.00<br><i>Field max:</i> 170.00<br><i>Measurement Unit:</i> mmHg                | <input type="text"/> mmHg |
| 14.5   | Systolic blood pressure day 3, average of measurement 1 & 2<br><i>Field type:</i> Calculation<br><i>Variable name:</i> Syst_BP_day_3<br><i>Field required:</i> Not required<br><i>Field min:</i> 50.00<br><i>Field max:</i> 240.00<br><i>Measurement Unit:</i> mmHg |                           |
| 14.6   | Diastolic blood pressure day 3, average of measurement 1 & 2<br><i>Field type:</i> Calculation<br><i>Variable name:</i> Dia_BP_day_3<br><i>Field required:</i> Not required<br><i>Field min:</i> 20.00<br><i>Field max:</i> 170.00<br><i>Measurement Unit:</i> mmHg |                           |

14.7 Diastolic blood pressure day 3  
*Field type:* Calculation  
*Variable name:* MAP\_day\_3  
*Field required:* Not required  
*Field min:* 20.00  
*Field max:* 170.00  
*Measurement Unit:* mmHg

# 15. Baseline - Polysomnography, sleep assesment 1

| Number | Question                                                                                                                                                                                                                 | Answers                                                                     |
|--------|--------------------------------------------------------------------------------------------------------------------------------------------------------------------------------------------------------------------------|-----------------------------------------------------------------------------|
| 15.1   | Date of baseline polysomnography<br><i>Field type:</i> Date<br><i>Variable name:</i> Date_PSG_1<br><i>Field required:</i> Required<br><i>Measurement Unit:</i> min                                                       | <input type="text"/> <input type="text"/> <input type="text"/> (dd-mm-yyyy) |
| 15.2   | Sleep stage artefact duration<br><i>Field type:</i> Numeric field<br><i>Variable name:</i> Sleep_artefact_min_1<br><i>Field required:</i> Required<br><i>Measurement Unit:</i> min                                       | <input type="text"/> min                                                    |
| 15.3   | Sleep stage artefact % total recording time<br><i>Field type:</i> Numeric field<br><i>Variable name:</i> Sleep_artefact_TRT_1<br><i>Field required:</i> Required<br><i>Measurement Unit:</i> %                           | <input type="text"/> %                                                      |
| 15.4   | Total recording time (TRT) night 1<br><i>Field type:</i> Numeric field<br><i>Variable name:</i> TRT_1<br><i>Field required:</i> Required<br><i>Measurement Unit:</i> min                                                 | <input type="text"/> min                                                    |
| 15.5   | Total sleep time (TST) night 1<br><i>Field type:</i> Numeric field<br><i>Variable name:</i> TST_1<br><i>Field required:</i> Required<br><i>Measurement Unit:</i> min                                                     | <input type="text"/> min                                                    |
| 15.6   | Sleep onset latency (SOL) night 1<br><i>Field type:</i> Numeric field<br><i>Variable name:</i> SOL_1<br><i>Field required:</i> Required<br><i>Measurement Unit:</i> min                                                  | <input type="text"/> min                                                    |
| 15.7   | Wake after sleep onset (WASO) night 1<br><i>Field type:</i> Numeric field<br><i>Variable name:</i> WASO_1<br><i>Field required:</i> Required<br><i>Measurement Unit:</i> min                                             | <input type="text"/> min                                                    |
| 15.8   | Number of awakenings (NA) night 1<br><i>Field type:</i> Numeric field<br><i>Variable name:</i> NA_1<br><i>Field required:</i> Required                                                                                   | <input type="text"/>                                                        |
| 15.9   | Sleep efficiency 1 (SE) night 1<br><i>Field type:</i> Numeric field<br><i>Variable name:</i> SE_1<br><i>Field required:</i> Required<br><i>Field min:</i> 0.00<br><i>Field max:</i> 100.00<br><i>Measurement Unit:</i> % | <input type="text"/> %                                                      |

|       |                                                                                                                                                                                                                  |                      |     |
|-------|------------------------------------------------------------------------------------------------------------------------------------------------------------------------------------------------------------------|----------------------|-----|
| 15.10 | Wake min night 1<br><i>Field type:</i> Numeric field<br><i>Variable name:</i> Wake_min_1<br><i>Field required:</i> Required<br><i>Measurement Unit:</i> min                                                      | <input type="text"/> | min |
| 15.11 | Wake %TRT night 1<br><i>Field type:</i> Numeric field<br><i>Variable name:</i> Wake_TRT_1<br><i>Field required:</i> Required<br><i>Field min:</i> 0.00<br><i>Field max:</i> 100.00<br><i>Measurement Unit:</i> % | <input type="text"/> | %   |
| 15.12 | N1 min night 1<br><i>Field type:</i> Numeric field<br><i>Variable name:</i> N1_min_1<br><i>Field required:</i> Required<br><i>Measurement Unit:</i> min                                                          | <input type="text"/> | min |
| 15.13 | N1 %TRT night 1<br><i>Field type:</i> Numeric field<br><i>Variable name:</i> N1_TRT_1<br><i>Field required:</i> Required<br><i>Field min:</i> 0.00<br><i>Field max:</i> 100.00<br><i>Measurement Unit:</i> %     | <input type="text"/> | %   |
| 15.14 | N1 %TST night 1<br><i>Field type:</i> Calculation<br><i>Variable name:</i> N1_TST_1<br><i>Field required:</i> Not required<br><i>Field min:</i> 0.00<br><i>Field max:</i> 100.00<br><i>Measurement Unit:</i> %   |                      |     |
| 15.15 | N2 min night 1<br><i>Field type:</i> Numeric field<br><i>Variable name:</i> N2_min_1<br><i>Field required:</i> Required<br><i>Measurement Unit:</i> min                                                          | <input type="text"/> | min |
| 15.16 | N2 %TRT night 1<br><i>Field type:</i> Numeric field<br><i>Variable name:</i> N2_TRT_1<br><i>Field required:</i> Required<br><i>Field min:</i> 0.00<br><i>Field max:</i> 100.00<br><i>Measurement Unit:</i> %     | <input type="text"/> | %   |
| 15.17 | N2 %TST night 1<br><i>Field type:</i> Calculation<br><i>Variable name:</i> N2_TST_1<br><i>Field required:</i> Not required<br><i>Field min:</i> 0.00<br><i>Field max:</i> 100.00<br><i>Measurement Unit:</i> %   |                      |     |

|       |                                                                                                                                                                                                                                    |                      |     |
|-------|------------------------------------------------------------------------------------------------------------------------------------------------------------------------------------------------------------------------------------|----------------------|-----|
| 15.18 | N3 min night 1<br><i>Field type:</i> Numeric field<br><i>Variable name:</i> N3_min_1<br><i>Field required:</i> Required<br><i>Measurement Unit:</i> min                                                                            | <input type="text"/> | min |
| 15.19 | N3 %TRT night 1<br><i>Field type:</i> Numeric field<br><i>Variable name:</i> N3_TRT_1<br><i>Field required:</i> Required<br><i>Field min:</i> 0.00<br><i>Field max:</i> 100.00<br><i>Measurement Unit:</i> %                       | <input type="text"/> | %   |
| 15.20 | N3 %total sleep time night 1<br><i>Field type:</i> Calculation<br><i>Variable name:</i> N3_TST_1<br><i>Field required:</i> Not required<br><i>Field min:</i> 0.00<br><i>Field max:</i> 100.00<br><i>Measurement Unit:</i> %        |                      |     |
| 15.21 | Light Sleep min night 1<br><i>Field type:</i> Calculation<br><i>Variable name:</i> LS_min_1<br><i>Field required:</i> Not required<br><i>Measurement Unit:</i> min                                                                 |                      |     |
| 15.22 | Light Sleep %TST night 1<br><i>Field type:</i> Calculation<br><i>Variable name:</i> LS_TST_1<br><i>Field required:</i> Not required<br><i>Field min:</i> 0.00<br><i>Field max:</i> 100.00<br><i>Measurement Unit:</i> %            |                      |     |
| 15.23 | Slow wave sleep (SWS) min night 1<br><i>Field type:</i> Numeric field<br><i>Variable name:</i> SWS_min_1<br><i>Field required:</i> Required<br><i>Measurement Unit:</i> min                                                        | <input type="text"/> | min |
| 15.24 | Slow wave sleep (SWS) %TRT night 1<br><i>Field type:</i> Numeric field<br><i>Variable name:</i> SWS_TRT_1<br><i>Field required:</i> Required<br><i>Field min:</i> 0.00<br><i>Field max:</i> 100.00<br><i>Measurement Unit:</i> %   | <input type="text"/> | %   |
| 15.25 | Slow wave sleep (SWS) %TST night 1<br><i>Field type:</i> Calculation<br><i>Variable name:</i> SWS_TST_1<br><i>Field required:</i> Not required<br><i>Field min:</i> 0.00<br><i>Field max:</i> 100.00<br><i>Measurement Unit:</i> % |                      |     |

|       |                                                                                                                                                                                                                                    |                      |     |
|-------|------------------------------------------------------------------------------------------------------------------------------------------------------------------------------------------------------------------------------------|----------------------|-----|
| 15.26 | NREM (non-REM) sleep min night 1<br><i>Field type:</i> Numeric field<br><i>Variable name:</i> NREM_min_1<br><i>Field required:</i> Required<br><i>Measurement Unit:</i> min                                                        | <input type="text"/> | min |
| 15.27 | NREM (non-REM) sleep %TRT night 1<br><i>Field type:</i> Numeric field<br><i>Variable name:</i> NREM_TRT_1<br><i>Field required:</i> Required<br><i>Field min:</i> 0.00<br><i>Field max:</i> 100.00<br><i>Measurement Unit:</i> %   | <input type="text"/> | %   |
| 15.28 | NREM (non-REM) sleep %TST night 1<br><i>Field type:</i> Calculation<br><i>Variable name:</i> NREM_TST_1<br><i>Field required:</i> Not required<br><i>Field min:</i> 0.00<br><i>Field max:</i> 100.00<br><i>Measurement Unit:</i> % |                      |     |
| 15.29 | REM min night 1<br><i>Field type:</i> Numeric field<br><i>Variable name:</i> REM_min_1<br><i>Field required:</i> Required<br><i>Measurement Unit:</i> min                                                                          | <input type="text"/> | min |
| 15.30 | REM % TRT night 1<br><i>Field type:</i> Numeric field<br><i>Variable name:</i> REM_TRT_1<br><i>Field required:</i> Required<br><i>Field min:</i> 0.00<br><i>Field max:</i> 100.00<br><i>Measurement Unit:</i> %                    | <input type="text"/> | %   |
| 15.31 | REM % total sleep time night 1<br><i>Field type:</i> Calculation<br><i>Variable name:</i> REM_TST_1<br><i>Field required:</i> Not required<br><i>Field min:</i> 0.00<br><i>Field max:</i> 100.00<br><i>Measurement Unit:</i> %     |                      |     |
| 15.32 | REMLAT min night 1<br><i>Field type:</i> Numeric field<br><i>Variable name:</i> REMLAT_min_1<br><i>Field required:</i> Required<br><i>Measurement Unit:</i> min                                                                    | <input type="text"/> | min |
| 15.33 | Stage shift index night 1<br><i>Field type:</i> Numeric field<br><i>Variable name:</i> SSI_1<br><i>Field required:</i> Required                                                                                                    | <input type="text"/> |     |
| 15.34 | Oxygen saturation artefact duration during sleep night 1<br><i>Field type:</i> Numeric field<br><i>Variable name:</i> SPO2_artefact_1<br><i>Field required:</i> Required<br><i>Measurement Unit:</i> min                           | <input type="text"/> | min |

|       |                                                                                                                                                                                                                     |                      |      |
|-------|---------------------------------------------------------------------------------------------------------------------------------------------------------------------------------------------------------------------|----------------------|------|
| 15.35 | Oxygen desaturation index from night 1<br><i>Field type:</i> Numeric field<br><i>Variable name:</i> ODI_1<br><i>Field required:</i> Required                                                                        | <input type="text"/> |      |
| 15.36 | Pulse transit time artefact duration during sleep night 1<br><i>Field type:</i> Numeric field<br><i>Variable name:</i> PTT_sleep_artefact_min_1<br><i>Field required:</i> Required<br><i>Measurement Unit:</i> min  | <input type="text"/> | min  |
| 15.37 | Pulse transit time artefact duration during REM night 1<br><i>Field type:</i> Numeric field<br><i>Variable name:</i> PTT_REM_artefact_min_1<br><i>Field required:</i> Required<br><i>Measurement Unit:</i> min      | <input type="text"/> | min  |
| 15.38 | Pulse transit time artefact duration during non-REM night 1<br><i>Field type:</i> Numeric field<br><i>Variable name:</i> PTT_NREM_artefact_min_1<br><i>Field required:</i> Required<br><i>Measurement Unit:</i> min | <input type="text"/> | min  |
| 15.39 | TST mean systolic BP night 1<br><i>Field type:</i> Numeric field<br><i>Variable name:</i> TST_Sys_BP_1<br><i>Field required:</i> Required<br><i>Measurement Unit:</i> mmHg                                          | <input type="text"/> | mmHg |
| 15.40 | TST mean diastolic BP night 1<br><i>Field type:</i> Numeric field<br><i>Variable name:</i> TST_Dia_BP_1<br><i>Field required:</i> Required<br><i>Measurement Unit:</i> mmHg                                         | <input type="text"/> | mmHg |
| 15.41 | NREM mean systolic BP night 1<br><i>Field type:</i> Numeric field<br><i>Variable name:</i> NREM_Sys_BP_1<br><i>Field required:</i> Required<br><i>Measurement Unit:</i> mmHg                                        | <input type="text"/> | mmHg |
| 15.42 | NREM mean diastolic BP night 1<br><i>Field type:</i> Numeric field<br><i>Variable name:</i> NREM_Dia_BP_1<br><i>Field required:</i> Required<br><i>Measurement Unit:</i> mmHg                                       | <input type="text"/> | mmHg |
| 15.43 | REM mean systolic BP night 1<br><i>Field type:</i> Numeric field<br><i>Variable name:</i> REM_Sys_BP_1<br><i>Field required:</i> Required<br><i>Measurement Unit:</i> mmHg                                          | <input type="text"/> | mmHg |
| 15.44 | REM mean diastolic BP night 1<br><i>Field type:</i> Numeric field<br><i>Variable name:</i> REM_Dia_BP_1<br><i>Field required:</i> Required<br><i>Measurement Unit:</i> mmHg                                         | <input type="text"/> | mmHg |



15.45 Mean arterial pressure night 1  
*Field type:* Calculation  
*Variable name:* MAP\_night\_1  
*Field required:* Not required

## 16. Baseline - Pre sleep HRV, sleep assessment 1

| Number | Question                                                                                                                                                                                                                                 | Answers                                                         |
|--------|------------------------------------------------------------------------------------------------------------------------------------------------------------------------------------------------------------------------------------------|-----------------------------------------------------------------|
| 16.1   | Start and stop time of pre-sleep segment, night 1<br><i>Field type:</i> Textfield<br><i>Variable name:</i> Time_PS_1<br><i>Field required:</i> Required<br><i>Measurement Unit:</i> hh:mm:ss-hh:mm:ss                                    | <input type="text"/> hh:mm:ss-<br><input type="text"/> hh:mm:ss |
| 16.2   | Artefact of pre-sleep segment, night 1<br><i>Field type:</i> Numeric field<br><i>Variable name:</i> Artefact_PS_1<br><i>Field required:</i> Required<br><i>Field min:</i> 0.00<br><i>Field max:</i> 100.00<br><i>Measurement Unit:</i> % | <input type="text"/> %                                          |
| 16.3   | Mean heart rate, Pre-sleep, night 1<br><i>Field type:</i> Numeric field<br><i>Variable name:</i> meanHR_PS_1<br><i>Field required:</i> Required<br><i>Measurement Unit:</i> beats per min                                                | <input type="text"/> beats per min                              |
| 16.4   | RMSSD Pre-sleep HRV night 1<br><i>Field type:</i> Numeric field<br><i>Variable name:</i> RMSSD_PS_1<br><i>Field required:</i> Required<br><i>Measurement Unit:</i> ms                                                                    | <input type="text"/> ms                                         |
| 16.5   | SDNN Pre-sleep HRV night 1<br><i>Field type:</i> Numeric field<br><i>Variable name:</i> SDNN_PS_1<br><i>Field required:</i> Required<br><i>Measurement Unit:</i> ms                                                                      | <input type="text"/> ms                                         |
| 16.6   | Total power, based on Lomb Scargle Periodogram, Pre-sleep, night 1<br><i>Field type:</i> Numeric field<br><i>Variable name:</i> TP_LSP_PS_1<br><i>Field required:</i> Required<br><i>Measurement Unit:</i> Hz                            | <input type="text"/> Hz                                         |
| 16.7   | Low frequency power, based on Lomb Scargle Periodogram, Pre-sleep, night 1<br><i>Field type:</i> Numeric field<br><i>Variable name:</i> LF_LSP_PS_1<br><i>Field required:</i> Required<br><i>Measurement Unit:</i> Hz                    | <input type="text"/> Hz                                         |
| 16.8   | High frequency power, based on Lomb Scargle Periodogram, Pre-sleep, night 1<br><i>Field type:</i> Numeric field<br><i>Variable name:</i> HF_LSP_PS_1<br><i>Field required:</i> Required<br><i>Measurement Unit:</i> Hz                   | <input type="text"/> Hz                                         |

---

|       |                                                                                                                                                                                                                          |                         |
|-------|--------------------------------------------------------------------------------------------------------------------------------------------------------------------------------------------------------------------------|-------------------------|
| 16.9  | LF/HF, based on Lomb Scargle Periodogram, Pre-sleep, night 1<br><i>Field type:</i> Numeric field<br><i>Variable name:</i> LFHF_LSP_PS_1<br><i>Field required:</i> Required                                               | <input type="text"/>    |
| 16.10 | Total power, based on Fast Fourier Transformation, Pre-sleep night 1<br><i>Field type:</i> Numeric field<br><i>Variable name:</i> TP_FFT_PS_1<br><i>Field required:</i> Required<br><i>Measurement Unit:</i> Hz          | <input type="text"/> Hz |
| 16.11 | Low frequency power, based on Fast Fourier Transformation, Pre-sleep night 1<br><i>Field type:</i> Numeric field<br><i>Variable name:</i> LF_FFT_PS_1<br><i>Field required:</i> Required<br><i>Measurement Unit:</i> Hz  | <input type="text"/> Hz |
| 16.12 | High frequency power, based on Fast Fourier Transformation, Pre-sleep night 1<br><i>Field type:</i> Numeric field<br><i>Variable name:</i> HF_FFT_PS_1<br><i>Field required:</i> Required<br><i>Measurement Unit:</i> Hz | <input type="text"/> Hz |
| 16.13 | LF/HF, based on Fast Fourier Transformation, Pre-sleep night 1<br><i>Field type:</i> Numeric field<br><i>Variable name:</i> LFHF_FFT_PS_1<br><i>Field required:</i> Required                                             | <input type="text"/>    |

---

# 17. Baseline - Nocturnal hour 1 HRV, sleep assessment 1

| Number | Question                                                                                                                                                                                                                                        | Answers                                                         |
|--------|-------------------------------------------------------------------------------------------------------------------------------------------------------------------------------------------------------------------------------------------------|-----------------------------------------------------------------|
| 17.1   | Start and stop time of nocturnal hour 1 segment, night 1<br><i>Field type:</i> Textfield<br><i>Variable name:</i> Time_h1_1<br><i>Field required:</i> Required<br><i>Measurement Unit:</i> hh:mm:ss-hh:mm:ss                                    | <input type="text"/> hh:mm:ss-<br><input type="text"/> hh:mm:ss |
| 17.2   | Artefact of nocturnal hour 1 segment, night 1<br><i>Field type:</i> Numeric field<br><i>Variable name:</i> Artefact_h1_1<br><i>Field required:</i> Required<br><i>Field min:</i> 0.00<br><i>Field max:</i> 100.00<br><i>Measurement Unit:</i> % | <input type="text"/> %                                          |
| 17.3   | Mean heart rate, nocturnal hour 1, night 1<br><i>Field type:</i> Numeric field<br><i>Variable name:</i> meanHR_h1_1<br><i>Field required:</i> Required<br><i>Measurement Unit:</i> beats per min                                                | <input type="text"/> beats per min                              |
| 17.4   | RMSSD, Nocturnal hour 1, night 1<br><i>Field type:</i> Numeric field<br><i>Variable name:</i> RMSSD_h1_1<br><i>Field required:</i> Required<br><i>Measurement Unit:</i> ms                                                                      | <input type="text"/> ms                                         |
| 17.5   | SDNN, Nocturnal hour 1, night 1<br><i>Field type:</i> Numeric field<br><i>Variable name:</i> SDNN_h1_1<br><i>Field required:</i> Required<br><i>Measurement Unit:</i> ms                                                                        | <input type="text"/> ms                                         |
| 17.6   | SDANN, Nocturnal hour 1, night 1<br><i>Field type:</i> Numeric field<br><i>Variable name:</i> SDANN_h1_1<br><i>Field required:</i> Required<br><i>Measurement Unit:</i> ms                                                                      | <input type="text"/> ms                                         |
| 17.7   | Total power, based on Lomb Scargle Periodogram, Nocturnal hour 1, night 1<br><i>Field type:</i> Numeric field<br><i>Variable name:</i> TP_LSP_h1_1<br><i>Field required:</i> Required<br><i>Measurement Unit:</i> Hz                            | <input type="text"/> Hz                                         |
| 17.8   | Low frequency power, based on Lomb Scargle Periodogram, Nocturnal hour 1, night 1<br><i>Field type:</i> Numeric field<br><i>Variable name:</i> LF_LSP_h1_1<br><i>Field required:</i> Required<br><i>Measurement Unit:</i> Hz                    | <input type="text"/> Hz                                         |

|       |                                                                                                                                                                                                                                  |                      |    |
|-------|----------------------------------------------------------------------------------------------------------------------------------------------------------------------------------------------------------------------------------|----------------------|----|
| 17.9  | High frequency power, based on Lomb Scargle Periodogram, Nocturnal hour 1, night 1<br><i>Field type:</i> Numeric field<br><i>Variable name:</i> HF_LSP_h1_1<br><i>Field required:</i> Required<br><i>Measurement Unit:</i> Hz    | <input type="text"/> | Hz |
| 17.10 | LF/HF, based on Lomb Scargle Periodogram, Nocturnal hour 1, night 1<br><i>Field type:</i> Numeric field<br><i>Variable name:</i> LFHF_LSP_h1_1<br><i>Field required:</i> Required                                                | <input type="text"/> |    |
| 17.11 | Total power, based on Fast Fourier Transformation, Nocturnal hour 1, night 1<br><i>Field type:</i> Numeric field<br><i>Variable name:</i> TP_FFT_h1_1<br><i>Field required:</i> Required<br><i>Measurement Unit:</i> Hz          | <input type="text"/> | Hz |
| 17.12 | Low frequency power, based on Fast Fourier Transformation, Nocturnal hour 1, night 1<br><i>Field type:</i> Numeric field<br><i>Variable name:</i> LF_FFT_h1_1<br><i>Field required:</i> Required<br><i>Measurement Unit:</i> Hz  | <input type="text"/> | Hz |
| 17.13 | High frequency power, based on Fast Fourier Transformation, Nocturnal hour 1, night 1<br><i>Field type:</i> Numeric field<br><i>Variable name:</i> HF_FFT_h1_1<br><i>Field required:</i> Required<br><i>Measurement Unit:</i> Hz | <input type="text"/> | Hz |
| 17.14 | LF/HF, based on Fast Fourier Transformation, Nocturnal hour 1, night 1<br><i>Field type:</i> Numeric field<br><i>Variable name:</i> LFHF_FFT_h1_1<br><i>Field required:</i> Required                                             | <input type="text"/> |    |

## 18. Baseline - Nocturnal hour 2 HRV, sleep assessment 1

| Number | Question                                                                                                                                                                                                                                        | Answers                                                         |
|--------|-------------------------------------------------------------------------------------------------------------------------------------------------------------------------------------------------------------------------------------------------|-----------------------------------------------------------------|
| 18.1   | Start and stop time of nocturnal hour 2 segment, night 1<br><i>Field type:</i> Textfield<br><i>Variable name:</i> Time_h2_1<br><i>Field required:</i> Required<br><i>Measurement Unit:</i> hh:mm:ss-hh:mm:ss                                    | <input type="text"/> hh:mm:ss-<br><input type="text"/> hh:mm:ss |
| 18.2   | Artefact of nocturnal hour 2 segment, night 1<br><i>Field type:</i> Numeric field<br><i>Variable name:</i> Artefact_h2_1<br><i>Field required:</i> Required<br><i>Field min:</i> 0.00<br><i>Field max:</i> 100.00<br><i>Measurement Unit:</i> % | <input type="text"/> %                                          |
| 18.3   | Mean heart rate, nocturnal hour 2, night 1<br><i>Field type:</i> Numeric field<br><i>Variable name:</i> meanHR_h2_1<br><i>Field required:</i> Required<br><i>Measurement Unit:</i> beats per min                                                | <input type="text"/> beats per min                              |
| 18.4   | RMSSD, Nocturnal hour 2, night 1<br><i>Field type:</i> Numeric field<br><i>Variable name:</i> RMSSD_h2_1<br><i>Field required:</i> Required<br><i>Measurement Unit:</i> ms                                                                      | <input type="text"/> ms                                         |
| 18.5   | SDNN, Nocturnal hour 2, night 1<br><i>Field type:</i> Numeric field<br><i>Variable name:</i> SDNN_h2_1<br><i>Field required:</i> Required<br><i>Measurement Unit:</i> ms                                                                        | <input type="text"/> ms                                         |
| 18.6   | SDANN, Nocturnal hour 2, night 1<br><i>Field type:</i> Numeric field<br><i>Variable name:</i> SDANN_h2_1<br><i>Field required:</i> Required<br><i>Measurement Unit:</i> ms                                                                      | <input type="text"/> ms                                         |
| 18.7   | Total power, based on Lomb Scargle Periodogram, Nocturnal hour 2, night 1<br><i>Field type:</i> Numeric field<br><i>Variable name:</i> TP_LSP_h2_1<br><i>Field required:</i> Required<br><i>Measurement Unit:</i> Hz                            | <input type="text"/> Hz                                         |
| 18.8   | Low frequency power, based on Lomb Scargle Periodogram, Nocturnal hour 2, night 1<br><i>Field type:</i> Numeric field<br><i>Variable name:</i> LF_LSP_h2_1<br><i>Field required:</i> Required<br><i>Measurement Unit:</i> Hz                    | <input type="text"/> Hz                                         |

---

|       |                                                                                                                                                                                                                                  |                         |
|-------|----------------------------------------------------------------------------------------------------------------------------------------------------------------------------------------------------------------------------------|-------------------------|
| 18.9  | High frequency power, based on Lomb Scargle Periodogram, Nocturnal hour 2, night 1<br><i>Field type:</i> Numeric field<br><i>Variable name:</i> HF_LSP_h2_1<br><i>Field required:</i> Required<br><i>Measurement Unit:</i> Hz    | <input type="text"/> Hz |
| 18.10 | LF/HF, based on Lomb Scargle Periodogram, Nocturnal hour 2, night 1<br><i>Field type:</i> Numeric field<br><i>Variable name:</i> LFHF_LSP_h2_1<br><i>Field required:</i> Required                                                | <input type="text"/>    |
| 18.11 | Total power, based on Fast Fourier Transformation, Nocturnal hour 2, night 1<br><i>Field type:</i> Numeric field<br><i>Variable name:</i> TP_FFT_h2_1<br><i>Field required:</i> Required<br><i>Measurement Unit:</i> Hz          | <input type="text"/> Hz |
| 18.12 | Low frequency power, based on Fast Fourier Transformation, Nocturnal hour 2, night 1<br><i>Field type:</i> Numeric field<br><i>Variable name:</i> LF_FFT_h2_1<br><i>Field required:</i> Required<br><i>Measurement Unit:</i> Hz  | <input type="text"/> Hz |
| 18.13 | High frequency power, based on Fast Fourier Transformation, Nocturnal hour 2, night 1<br><i>Field type:</i> Numeric field<br><i>Variable name:</i> HF_FFT_h2_1<br><i>Field required:</i> Required<br><i>Measurement Unit:</i> Hz | <input type="text"/> Hz |
| 18.14 | LF/HF, based on Fast Fourier Transformation, Nocturnal hour 2, night 1<br><i>Field type:</i> Numeric field<br><i>Variable name:</i> LFHF_FFT_h2_1<br><i>Field required:</i> Required                                             | <input type="text"/>    |

---

# 19. Baseline - Nocturnal hour 3 HRV, sleep assessment 1

| Number | Question                                                                                                                                                                                                                                        | Answers                                                         |
|--------|-------------------------------------------------------------------------------------------------------------------------------------------------------------------------------------------------------------------------------------------------|-----------------------------------------------------------------|
| 19.1   | Start and stop time of nocturnal hour 3 segment, night 1<br><i>Field type:</i> Textfield<br><i>Variable name:</i> Time_h3_1<br><i>Field required:</i> Required<br><i>Measurement Unit:</i> hh:mm:ss-hh:mm:ss                                    | <input type="text"/> hh:mm:ss-<br><input type="text"/> hh:mm:ss |
| 19.2   | Artefact of nocturnal hour 3 segment, night 1<br><i>Field type:</i> Numeric field<br><i>Variable name:</i> Artefact_h3_1<br><i>Field required:</i> Required<br><i>Field min:</i> 0.00<br><i>Field max:</i> 100.00<br><i>Measurement Unit:</i> % | <input type="text"/> %                                          |
| 19.3   | Mean heart rate, nocturnal hour 3, night 1<br><i>Field type:</i> Numeric field<br><i>Variable name:</i> meanHR_h3_1<br><i>Field required:</i> Required<br><i>Measurement Unit:</i> beats per min                                                | <input type="text"/> beats per min                              |
| 19.4   | RMSSD, Nocturnal hour 3, night 1<br><i>Field type:</i> Numeric field<br><i>Variable name:</i> RMSSD_h3_1<br><i>Field required:</i> Required<br><i>Measurement Unit:</i> ms                                                                      | <input type="text"/> ms                                         |
| 19.5   | SDNN, Nocturnal hour 3, night 1<br><i>Field type:</i> Numeric field<br><i>Variable name:</i> SDNN_h3_1<br><i>Field required:</i> Required<br><i>Measurement Unit:</i> ms                                                                        | <input type="text"/> ms                                         |
| 19.6   | SDANN, Nocturnal hour 3, night 1<br><i>Field type:</i> Numeric field<br><i>Variable name:</i> SDANN_h3_1<br><i>Field required:</i> Required<br><i>Measurement Unit:</i> ms                                                                      | <input type="text"/> ms                                         |
| 19.7   | Total power, based on Lomb Scargle Periodogram, Nocturnal hour 3, night 1<br><i>Field type:</i> Numeric field<br><i>Variable name:</i> TP_LSP_h3_1<br><i>Field required:</i> Required<br><i>Measurement Unit:</i> Hz                            | <input type="text"/> Hz                                         |
| 19.8   | Low frequency power, based on Lomb Scargle Periodogram, Nocturnal hour 3, night 1<br><i>Field type:</i> Numeric field<br><i>Variable name:</i> LF_LSP_h3_1<br><i>Field required:</i> Required<br><i>Measurement Unit:</i> Hz                    | <input type="text"/> Hz                                         |



---

|       |                                                                                                                                                                                                                                  |                         |
|-------|----------------------------------------------------------------------------------------------------------------------------------------------------------------------------------------------------------------------------------|-------------------------|
| 19.9  | High frequency power, based on Lomb Scargle Periodogram, Nocturnal hour 3, night 1<br><i>Field type:</i> Numeric field<br><i>Variable name:</i> HF_LSP_h3_1<br><i>Field required:</i> Required<br><i>Measurement Unit:</i> Hz    | <input type="text"/> Hz |
| 19.10 | LF/HF, based on Lomb Scargle Periodogram, Nocturnal hour 3, night 1<br><i>Field type:</i> Numeric field<br><i>Variable name:</i> LFHF_LSP_h3_1<br><i>Field required:</i> Required                                                | <input type="text"/>    |
| 19.11 | Total power, based on Fast Fourier Transformation, Nocturnal hour 3, night 1<br><i>Field type:</i> Numeric field<br><i>Variable name:</i> TP_FFT_h3_1<br><i>Field required:</i> Required<br><i>Measurement Unit:</i> Hz          | <input type="text"/> Hz |
| 19.12 | Low frequency power, based on Fast Fourier Transformation, Nocturnal hour 3, night 1<br><i>Field type:</i> Numeric field<br><i>Variable name:</i> LF_FFT_h3_1<br><i>Field required:</i> Required<br><i>Measurement Unit:</i> Hz  | <input type="text"/> Hz |
| 19.13 | High frequency power, based on Fast Fourier Transformation, Nocturnal hour 3, night 1<br><i>Field type:</i> Numeric field<br><i>Variable name:</i> HF_FFT_h3_1<br><i>Field required:</i> Required<br><i>Measurement Unit:</i> Hz | <input type="text"/> Hz |
| 19.14 | LF/HF, based on Fast Fourier Transformation, Nocturnal hour 3, night 1<br><i>Field type:</i> Numeric field<br><i>Variable name:</i> LFHF_FFT_h3_1<br><i>Field required:</i> Required                                             | <input type="text"/>    |

---

## 20. Baseline - Nocturnal hour 4 HRV, sleep assessment 1

| Number | Question                                                                                                                                                                                                                                        | Answers                                                         |
|--------|-------------------------------------------------------------------------------------------------------------------------------------------------------------------------------------------------------------------------------------------------|-----------------------------------------------------------------|
| 20.1   | Start and stop time of nocturnal hour 4 segment, night 1<br><i>Field type:</i> Textfield<br><i>Variable name:</i> Time_h4_1<br><i>Field required:</i> Required<br><i>Measurement Unit:</i> hh:mm:ss-hh:mm:ss                                    | <input type="text"/> hh:mm:ss-<br><input type="text"/> hh:mm:ss |
| 20.2   | Artefact of nocturnal hour 4 segment, night 1<br><i>Field type:</i> Numeric field<br><i>Variable name:</i> Artefact_h4_1<br><i>Field required:</i> Required<br><i>Field min:</i> 0.00<br><i>Field max:</i> 100.00<br><i>Measurement Unit:</i> % | <input type="text"/> %                                          |
| 20.3   | Mean heart rate, nocturnal hour 4, night 1<br><i>Field type:</i> Numeric field<br><i>Variable name:</i> meanHR_h4_1<br><i>Field required:</i> Required<br><i>Measurement Unit:</i> beats per min                                                | <input type="text"/> beats per min                              |
| 20.4   | RMSSD, Nocturnal hour 4, night 1<br><i>Field type:</i> Numeric field<br><i>Variable name:</i> RMSSD_h4_1<br><i>Field required:</i> Required<br><i>Measurement Unit:</i> ms                                                                      | <input type="text"/> ms                                         |
| 20.5   | SDNN, Nocturnal hour 4, night 1<br><i>Field type:</i> Numeric field<br><i>Variable name:</i> SDNN_h4_1<br><i>Field required:</i> Required<br><i>Measurement Unit:</i> ms                                                                        | <input type="text"/> ms                                         |
| 20.6   | SDANN, Nocturnal hour 4, night 1<br><i>Field type:</i> Numeric field<br><i>Variable name:</i> SDANN_h4_1<br><i>Field required:</i> Required<br><i>Measurement Unit:</i> ms                                                                      | <input type="text"/> ms                                         |
| 20.7   | Total power, based on Lomb Scargle Periodogram, Nocturnal hour 4, night 1<br><i>Field type:</i> Numeric field<br><i>Variable name:</i> TP_LSP_h4_1<br><i>Field required:</i> Required<br><i>Measurement Unit:</i> Hz                            | <input type="text"/> Hz                                         |
| 20.8   | Low frequency power, based on Lomb Scargle Periodogram, Nocturnal hour 4, night 1<br><i>Field type:</i> Numeric field<br><i>Variable name:</i> LF_LSP_h4_1<br><i>Field required:</i> Required<br><i>Measurement Unit:</i> Hz                    | <input type="text"/> Hz                                         |

|       |                                                                                                                                                                                                                                  |                         |
|-------|----------------------------------------------------------------------------------------------------------------------------------------------------------------------------------------------------------------------------------|-------------------------|
| 20.9  | High frequency power, based on Lomb Scargle Periodogram, Nocturnal hour 4, night 1<br><i>Field type:</i> Numeric field<br><i>Variable name:</i> HF_LSP_h4_1<br><i>Field required:</i> Required<br><i>Measurement Unit:</i> Hz    | <input type="text"/> Hz |
| 20.10 | LF/HF, based on Lomb Scargle Periodogram, Nocturnal hour 4, night 1<br><i>Field type:</i> Numeric field<br><i>Variable name:</i> LFHF_LSP_h4_1<br><i>Field required:</i> Required                                                | <input type="text"/>    |
| 20.11 | Total power, based on Fast Fourier Transformation, Nocturnal hour 4, night 1<br><i>Field type:</i> Numeric field<br><i>Variable name:</i> TP_FFT_h4_1<br><i>Field required:</i> Required<br><i>Measurement Unit:</i> Hz          | <input type="text"/> Hz |
| 20.12 | Low frequency power, based on Fast Fourier Transformation, Nocturnal hour 4, night 1<br><i>Field type:</i> Numeric field<br><i>Variable name:</i> LF_FFT_h4_1<br><i>Field required:</i> Required<br><i>Measurement Unit:</i> Hz  | <input type="text"/> Hz |
| 20.13 | High frequency power, based on Fast Fourier Transformation, Nocturnal hour 4, night 1<br><i>Field type:</i> Numeric field<br><i>Variable name:</i> HF_FFT_h4_1<br><i>Field required:</i> Required<br><i>Measurement Unit:</i> Hz | <input type="text"/> Hz |
| 20.14 | LF/HF, based on Fast Fourier Transformation, Nocturnal hour 4, night 1<br><i>Field type:</i> Numeric field<br><i>Variable name:</i> LFHF_FFT_h4_1<br><i>Field required:</i> Required                                             | <input type="text"/>    |

## 21. Baseline - Nocturnal hour 5 HRV, sleep assessment 1

| Number | Question                                                                                                                                                                                                                                        | Answers                                                         |
|--------|-------------------------------------------------------------------------------------------------------------------------------------------------------------------------------------------------------------------------------------------------|-----------------------------------------------------------------|
| 21.1   | Start and stop time of nocturnal hour 5 segment, night 1<br><i>Field type:</i> Textfield<br><i>Variable name:</i> Time_h5_1<br><i>Field required:</i> Required<br><i>Measurement Unit:</i> hh:mm:ss-hh:mm:ss                                    | <input type="text"/> hh:mm:ss-<br><input type="text"/> hh:mm:ss |
| 21.2   | Artefact of nocturnal hour 5 segment, night 1<br><i>Field type:</i> Numeric field<br><i>Variable name:</i> Artefact_h5_1<br><i>Field required:</i> Required<br><i>Field min:</i> 0.00<br><i>Field max:</i> 100.00<br><i>Measurement Unit:</i> % | <input type="text"/> %                                          |
| 21.3   | Mean heart rate, nocturnal hour 5, night 1<br><i>Field type:</i> Numeric field<br><i>Variable name:</i> meanHR_h5_1<br><i>Field required:</i> Required<br><i>Measurement Unit:</i> beats per min                                                | <input type="text"/> beats per min                              |
| 21.4   | RMSSD, Nocturnal hour 5, night 1<br><i>Field type:</i> Numeric field<br><i>Variable name:</i> RMSSD_h5_1<br><i>Field required:</i> Required<br><i>Measurement Unit:</i> ms                                                                      | <input type="text"/> ms                                         |
| 21.5   | SDNN, Nocturnal hour 5, night 1<br><i>Field type:</i> Numeric field<br><i>Variable name:</i> SDNN_h5_1<br><i>Field required:</i> Required<br><i>Measurement Unit:</i> ms                                                                        | <input type="text"/> ms                                         |
| 21.6   | SDANN, Nocturnal hour 5, night 1<br><i>Field type:</i> Numeric field<br><i>Variable name:</i> SDANN_h5_1<br><i>Field required:</i> Required<br><i>Measurement Unit:</i> ms                                                                      | <input type="text"/> ms                                         |
| 21.7   | Total power, based on Lomb Scargle Periodogram, Nocturnal hour 5, night 1<br><i>Field type:</i> Numeric field<br><i>Variable name:</i> TP_LSP_h5_1<br><i>Field required:</i> Required<br><i>Measurement Unit:</i> Hz                            | <input type="text"/> Hz                                         |
| 21.8   | Low frequency power, based on Lomb Scargle Periodogram, Nocturnal hour 5, night 1<br><i>Field type:</i> Numeric field<br><i>Variable name:</i> LF_LSP_h5_1<br><i>Field required:</i> Required<br><i>Measurement Unit:</i> Hz                    | <input type="text"/> Hz                                         |

|       |                                                                                                                                                                                                                                  |                      |    |
|-------|----------------------------------------------------------------------------------------------------------------------------------------------------------------------------------------------------------------------------------|----------------------|----|
| 21.9  | High frequency power, based on Lomb Scargle Periodogram, Nocturnal hour 5, night 1<br><i>Field type:</i> Numeric field<br><i>Variable name:</i> HF_LSP_h5_1<br><i>Field required:</i> Required<br><i>Measurement Unit:</i> Hz    | <input type="text"/> | Hz |
| 21.10 | LF/HF, based on Lomb Scargle Periodogram, Nocturnal hour 5, night 1<br><i>Field type:</i> Numeric field<br><i>Variable name:</i> LFHF_LSP_h5_1<br><i>Field required:</i> Required                                                | <input type="text"/> |    |
| 21.11 | Total power, based on Fast Fourier Transformation, Nocturnal hour 5, night 1<br><i>Field type:</i> Numeric field<br><i>Variable name:</i> TP_FFT_h5_1<br><i>Field required:</i> Required<br><i>Measurement Unit:</i> Hz          | <input type="text"/> | Hz |
| 21.12 | Low frequency power, based on Fast Fourier Transformation, Nocturnal hour 5, night 1<br><i>Field type:</i> Numeric field<br><i>Variable name:</i> LF_FFT_h5_1<br><i>Field required:</i> Required<br><i>Measurement Unit:</i> Hz  | <input type="text"/> | Hz |
| 21.13 | High frequency power, based on Fast Fourier Transformation, Nocturnal hour 5, night 1<br><i>Field type:</i> Numeric field<br><i>Variable name:</i> HF_FFT_h5_1<br><i>Field required:</i> Required<br><i>Measurement Unit:</i> Hz | <input type="text"/> | Hz |
| 21.14 | LF/HF, based on Fast Fourier Transformation, Nocturnal hour 5, night 1<br><i>Field type:</i> Numeric field<br><i>Variable name:</i> LFHF_FFT_h5_1<br><i>Field required:</i> Required                                             | <input type="text"/> |    |

## 22. Baseline - Nocturnal hour 6 HRV, sleep assessment 1

| Number | Question                                                                                                                                                                                                                                        | Answers                                                         |
|--------|-------------------------------------------------------------------------------------------------------------------------------------------------------------------------------------------------------------------------------------------------|-----------------------------------------------------------------|
| 22.1   | Start and stop time of nocturnal hour 6 segment, night 1<br><i>Field type:</i> Textfield<br><i>Variable name:</i> Time_h6_1<br><i>Field required:</i> Required<br><i>Measurement Unit:</i> hh:mm:ss-hh:mm:ss                                    | <input type="text"/> hh:mm:ss-<br><input type="text"/> hh:mm:ss |
| 22.2   | Artefact of nocturnal hour 6 segment, night 1<br><i>Field type:</i> Numeric field<br><i>Variable name:</i> Artefact_h6_1<br><i>Field required:</i> Required<br><i>Field min:</i> 0.00<br><i>Field max:</i> 100.00<br><i>Measurement Unit:</i> % | <input type="text"/> %                                          |
| 22.3   | Mean heart rate, nocturnal hour 6, night 1<br><i>Field type:</i> Numeric field<br><i>Variable name:</i> meanHR_h6_1<br><i>Field required:</i> Required<br><i>Measurement Unit:</i> beats per min                                                | <input type="text"/> beats per min                              |
| 22.4   | RMSSD, Nocturnal hour 6, night 1<br><i>Field type:</i> Numeric field<br><i>Variable name:</i> RMSSD_h6_1<br><i>Field required:</i> Required<br><i>Measurement Unit:</i> ms                                                                      | <input type="text"/> ms                                         |
| 22.5   | SDNN, Nocturnal hour 6, night 1<br><i>Field type:</i> Numeric field<br><i>Variable name:</i> SDNN_h6_1<br><i>Field required:</i> Required<br><i>Measurement Unit:</i> ms                                                                        | <input type="text"/> ms                                         |
| 22.6   | SDANN, Nocturnal hour 6, night 1<br><i>Field type:</i> Numeric field<br><i>Variable name:</i> SDANN_h6_1<br><i>Field required:</i> Required<br><i>Measurement Unit:</i> ms                                                                      | <input type="text"/> ms                                         |
| 22.7   | Total power, based on Lomb Scargle Periodogram, Nocturnal hour 6, night 1<br><i>Field type:</i> Numeric field<br><i>Variable name:</i> TP_LSP_h6_1<br><i>Field required:</i> Required<br><i>Measurement Unit:</i> Hz                            | <input type="text"/> Hz                                         |
| 22.8   | Low frequency power, based on Lomb Scargle Periodogram, Nocturnal hour 6, night 1<br><i>Field type:</i> Numeric field<br><i>Variable name:</i> LF_LSP_h6_1<br><i>Field required:</i> Required<br><i>Measurement Unit:</i> Hz                    | <input type="text"/> Hz                                         |

---

|       |                                                                                                                                                                                                                                  |                         |
|-------|----------------------------------------------------------------------------------------------------------------------------------------------------------------------------------------------------------------------------------|-------------------------|
| 22.9  | High frequency power, based on Lomb Scargle Periodogram, Nocturnal hour 6, night 1<br><i>Field type:</i> Numeric field<br><i>Variable name:</i> HF_LSP_h6_1<br><i>Field required:</i> Required<br><i>Measurement Unit:</i> Hz    | <input type="text"/> Hz |
| 22.10 | LF/HF, based on Lomb Scargle Periodogram, Nocturnal hour 6, night 1<br><i>Field type:</i> Numeric field<br><i>Variable name:</i> LFHF_LSP_h6_1<br><i>Field required:</i> Required                                                | <input type="text"/>    |
| 22.11 | Total power, based on Fast Fourier Transformation, Nocturnal hour 6, night 1<br><i>Field type:</i> Numeric field<br><i>Variable name:</i> TP_FFT_h6_1<br><i>Field required:</i> Required<br><i>Measurement Unit:</i> Hz          | <input type="text"/> Hz |
| 22.12 | Low frequency power, based on Fast Fourier Transformation, Nocturnal hour 6, night 1<br><i>Field type:</i> Numeric field<br><i>Variable name:</i> LF_FFT_h6_1<br><i>Field required:</i> Required<br><i>Measurement Unit:</i> Hz  | <input type="text"/> Hz |
| 22.13 | High frequency power, based on Fast Fourier Transformation, Nocturnal hour 6, night 1<br><i>Field type:</i> Numeric field<br><i>Variable name:</i> HF_FFT_h6_1<br><i>Field required:</i> Required<br><i>Measurement Unit:</i> Hz | <input type="text"/> Hz |
| 22.14 | LF/HF, based on Fast Fourier Transformation, Nocturnal hour 6, night 1<br><i>Field type:</i> Numeric field<br><i>Variable name:</i> LFHF_FFT_h6_1<br><i>Field required:</i> Required                                             | <input type="text"/>    |

---

## 23. Baseline - Morning HRV, sleep assessment 1

| Number | Question                                                                                                                                                                                                                              | Answers                                                         |
|--------|---------------------------------------------------------------------------------------------------------------------------------------------------------------------------------------------------------------------------------------|-----------------------------------------------------------------|
| 23.1   | Start and stop time of morning segment, night 1<br><i>Field type:</i> Textfield<br><i>Variable name:</i> Time_m_1<br><i>Field required:</i> Required<br><i>Measurement Unit:</i> hh:mm:ss-hh:mm:ss                                    | <input type="text"/> hh:mm:ss-<br><input type="text"/> hh:mm:ss |
| 23.2   | Artefact of morning segment, night 1<br><i>Field type:</i> Numeric field<br><i>Variable name:</i> Artefact_m_1<br><i>Field required:</i> Required<br><i>Field min:</i> 0.00<br><i>Field max:</i> 100.00<br><i>Measurement Unit:</i> % | <input type="text"/> %                                          |
| 23.3   | Mean heart rate, morning, night 1<br><i>Field type:</i> Numeric field<br><i>Variable name:</i> meanHR_m_1<br><i>Field required:</i> Required<br><i>Measurement Unit:</i> beats per min                                                | <input type="text"/> beats per min                              |
| 23.4   | RMSSD morning HRV night 1<br><i>Field type:</i> Numeric field<br><i>Variable name:</i> RMSSD_m_1<br><i>Field required:</i> Required<br><i>Measurement Unit:</i> ms                                                                    | <input type="text"/> ms                                         |
| 23.5   | SDNN morning HRV night 1<br><i>Field type:</i> Numeric field<br><i>Variable name:</i> SDNN_m_1<br><i>Field required:</i> Required<br><i>Measurement Unit:</i> ms                                                                      | <input type="text"/> ms                                         |
| 23.6   | Total power, based on Lomb Scargle Periodogram, morning, night 1<br><i>Field type:</i> Numeric field<br><i>Variable name:</i> TP_LSP_m_1<br><i>Field required:</i> Required<br><i>Measurement Unit:</i> Hz                            | <input type="text"/> Hz                                         |
| 23.7   | Low frequency power, based on Lomb Scargle Periodogram, morning, night 1<br><i>Field type:</i> Numeric field<br><i>Variable name:</i> LF_LSP_m_1<br><i>Field required:</i> Required<br><i>Measurement Unit:</i> Hz                    | <input type="text"/> Hz                                         |
| 23.8   | High frequency power, based on Lomb Scargle Periodogram, morning, night 1<br><i>Field type:</i> Numeric field<br><i>Variable name:</i> HF_LSP_m_1<br><i>Field required:</i> Required<br><i>Measurement Unit:</i> Hz                   | <input type="text"/> Hz                                         |



---

|       |                                                                                                                                                                                                                        |                         |
|-------|------------------------------------------------------------------------------------------------------------------------------------------------------------------------------------------------------------------------|-------------------------|
| 23.9  | LF/HF, based on Lomb Scargle Periodogram, morning, night 1<br><i>Field type:</i> Numeric field<br><i>Variable name:</i> LFHF_LSP_m_1<br><i>Field required:</i> Required                                                | <input type="text"/>    |
| 23.10 | Total power, based on Fast Fourier Transformation, morning, night 1<br><i>Field type:</i> Numeric field<br><i>Variable name:</i> TP_FFT_m_1<br><i>Field required:</i> Required<br><i>Measurement Unit:</i> Hz          | <input type="text"/> Hz |
| 23.11 | Low frequency power, based on Fast Fourier Transformation, morning, night 1<br><i>Field type:</i> Numeric field<br><i>Variable name:</i> LF_FFT_m_1<br><i>Field required:</i> Required<br><i>Measurement Unit:</i> Hz  | <input type="text"/> Hz |
| 23.12 | High frequency power, based on Fast Fourier Transformation, morning, night 1<br><i>Field type:</i> Numeric field<br><i>Variable name:</i> HF_FFT_m_1<br><i>Field required:</i> Required<br><i>Measurement Unit:</i> Hz | <input type="text"/> Hz |
| 23.13 | LF/HF, based on Fast Fourier Transformation, morning, night 1<br><i>Field type:</i> Numeric field<br><i>Variable name:</i> LFHF_FFT_m_1<br><i>Field required:</i> Required                                             | <input type="text"/>    |

---

## 24. Baseline - Pre-sleep arousal scale

| Number | Question                                                                                                                                                                                 | Answers |
|--------|------------------------------------------------------------------------------------------------------------------------------------------------------------------------------------------|---------|
| 24.1   | PSAS somatic night 1<br><i>Field type:</i> Calculation<br><i>Variable name:</i> PSAS_som_1<br><i>Field required:</i> Not required<br><i>Field min:</i> 8.00<br><i>Field max:</i> 40.00   |         |
| 24.2   | PSAS cognitive night 1<br><i>Field type:</i> Calculation<br><i>Variable name:</i> PSAS_cog_1<br><i>Field required:</i> Not required<br><i>Field min:</i> 7.00<br><i>Field max:</i> 35.00 |         |

## 25. Baseline - Schlafragebogen A baseline

| Number | Question                                                                                                                                                                                                                               | Answers |
|--------|----------------------------------------------------------------------------------------------------------------------------------------------------------------------------------------------------------------------------------------|---------|
| 25.1   | Schlafragebogen A 23d night 1<br><i>Field type:</i> Calculation<br><i>Variable name:</i> SFA_23d_1<br><i>Field required:</i> Not required<br><i>Field min:</i> 1.00<br><i>Field max:</i> 5.00                                          |         |
| 25.2   | Schlafragebogen A Allgemeine Schlafcharakterisierung night 1<br><i>Field type:</i> Calculation<br><i>Variable name:</i> SFA_ASC_1<br><i>Field required:</i> Not required                                                               |         |
| 25.3   | Schlafragebogen A Vorzeitiges Aufwachen night 1<br><i>Field type:</i> Calculation<br><i>Variable name:</i> SFA_VZA_1<br><i>Field required:</i> Not required                                                                            |         |
| 25.4   | Schlafragebogen A Durchschlafschwierigkeiten night 1<br><i>Field type:</i> Calculation<br><i>Variable name:</i> SFA_DSS_1<br><i>Field required:</i> Not required                                                                       |         |
| 25.5   | Schlafragebogen A Einschlafschwierigkeiten night 1<br><i>Field type:</i> Calculation<br><i>Variable name:</i> SFA_ESS_1<br><i>Field required:</i> Not required                                                                         |         |
| 25.6   | Schlafragebogen A Schlafqualität night 1<br><i>Field type:</i> Calculation<br><i>Variable name:</i> SFA_SQ_1<br><i>Field required:</i> Not required<br><i>Field min:</i> 1.00<br><i>Field max:</i> 5.00                                |         |
| 25.7   | Schlafragebogen A Gefühl des Erholtseins nach dem Schlaf night 1<br><i>Field type:</i> Calculation<br><i>Variable name:</i> SFA_GES_1<br><i>Field required:</i> Not required<br><i>Field min:</i> 1.00<br><i>Field max:</i> 5.00       |         |
| 25.8   | Schlafragebogen A Psychomotorische Symptome in der Schlafphase night 1<br><i>Field type:</i> Calculation<br><i>Variable name:</i> SFA_PSS_1<br><i>Field required:</i> Not required<br><i>Field min:</i> 1.00<br><i>Field max:</i> 5.00 |         |

---

25.9      Schlafragebogen A Gesamtschlafdauer (Stunden) night 1  
*Field type:* Calculation  
*Variable name:* SFA\_GSD\_1  
*Field required:* Not required  
*Field min:* 1.00  
*Field max:* 5.00

---

25.10     Schlafragebogen A Psychische Ausgeglichenheit vor dem  
Schlafengehen night 1  
*Field type:* Calculation  
*Variable name:* SFA\_PSYA\_1  
*Field required:* Not required  
*Field min:* 1.00  
*Field max:* 5.00

---

25.11     Schlafragebogen A Psychisches Erschöpftsein vor dem  
Schlafengehen night 1  
*Field type:* Calculation  
*Variable name:* SFA\_PSYE\_1  
*Field required:* Not required  
*Field min:* 1.00  
*Field max:* 5.00

## 26. Day 4 - Allocation

| Number | Question                                                                                                                                                    | Answers                                                                 |
|--------|-------------------------------------------------------------------------------------------------------------------------------------------------------------|-------------------------------------------------------------------------|
| 26.1   | Allocation<br><i>Field type:</i> Radiobutton<br><i>Variable name:</i> Allocation<br><i>Field required:</i> Required<br><i>Option group name:</i> Allocation | <input type="radio"/> Control<br><input type="radio"/> Aerobic exercise |

## 27. Day 4 - Intervention

| Number | Question                                                                                                                                                                                                                  | Answers |
|--------|---------------------------------------------------------------------------------------------------------------------------------------------------------------------------------------------------------------------------|---------|
| 27.1   | Befindlichkeitsskala activity pre-exercise<br><i>Field type:</i> Calculation<br><i>Variable name:</i> BFS_activity_1<br><i>Field required:</i> Not required<br><i>Field min:</i> 1.00<br><i>Field max:</i> 5.00           |         |
| 27.2   | Befindlichkeitsskala elation pre-exercise<br><i>Field type:</i> Calculation<br><i>Variable name:</i> BFS_elation_1<br><i>Field required:</i> Not required<br><i>Field min:</i> 1.00<br><i>Field max:</i> 5.00             |         |
| 27.3   | Befindlichkeitsskala contemplation pre-exercise<br><i>Field type:</i> Calculation<br><i>Variable name:</i> BFS_contemplation_1<br><i>Field required:</i> Not required<br><i>Field min:</i> 1.00<br><i>Field max:</i> 5.00 |         |
| 27.4   | Befindlichkeitsskala calmness pre-exercise<br><i>Field type:</i> Calculation<br><i>Variable name:</i> BFS_calmness_1<br><i>Field required:</i> Not required<br><i>Field min:</i> 1.00<br><i>Field max:</i> 5.00           |         |
| 27.5   | Befindlichkeitsskala fatigue pre-exercise<br><i>Field type:</i> Calculation<br><i>Variable name:</i> BFS_fatigue_1<br><i>Field required:</i> Not required<br><i>Field min:</i> 1.00<br><i>Field max:</i> 5.00             |         |
| 27.6   | Befindlichkeitsskala depression pre-exercise<br><i>Field type:</i> Calculation<br><i>Variable name:</i> BFS_depression_1<br><i>Field required:</i> Not required<br><i>Field min:</i> 1.00<br><i>Field max:</i> 5.00       |         |
| 27.7   | Befindlichkeitsskala anger pre-exercise<br><i>Field type:</i> Calculation<br><i>Variable name:</i> BFS_anger_1<br><i>Field required:</i> Not required<br><i>Field min:</i> 1.00<br><i>Field max:</i> 5.00                 |         |
| 27.8   | Befindlichkeitsskala excitement pre-exercise<br><i>Field type:</i> Calculation<br><i>Variable name:</i> BFS_excitement_1<br><i>Field required:</i> Not required<br><i>Field min:</i> 1.00<br><i>Field max:</i> 5.00       |         |

---

|       |                                                                                                                                                                                                                            |
|-------|----------------------------------------------------------------------------------------------------------------------------------------------------------------------------------------------------------------------------|
| 27.9  | Befindlichkeitsskala activity post-exercise<br><i>Field type:</i> Calculation<br><i>Variable name:</i> BFS_activity_2<br><i>Field required:</i> Not required<br><i>Field min:</i> 1.00<br><i>Field max:</i> 5.00           |
| 27.10 | Befindlichkeitsskala elation post-exercise<br><i>Field type:</i> Calculation<br><i>Variable name:</i> BFS_elation_2<br><i>Field required:</i> Not required<br><i>Field min:</i> 1.00<br><i>Field max:</i> 5.00             |
| 27.11 | Befindlichkeitsskala contemplation post-exercise<br><i>Field type:</i> Calculation<br><i>Variable name:</i> BFS_contemplation_2<br><i>Field required:</i> Not required<br><i>Field min:</i> 1.00<br><i>Field max:</i> 5.00 |
| 27.12 | Befindlichkeitsskala calmness post-exercise<br><i>Field type:</i> Calculation<br><i>Variable name:</i> BFS_calmness_2<br><i>Field required:</i> Not required<br><i>Field min:</i> 1.00<br><i>Field max:</i> 5.00           |
| 27.13 | Befindlichkeitsskala fatigue post-exercise<br><i>Field type:</i> Calculation<br><i>Variable name:</i> BFS_fatigue_2<br><i>Field required:</i> Not required<br><i>Field min:</i> 1.00<br><i>Field max:</i> 5.00             |
| 27.14 | Befindlichkeitsskala depression post-exercise<br><i>Field type:</i> Calculation<br><i>Variable name:</i> BFS_depression_2<br><i>Field required:</i> Not required<br><i>Field min:</i> 1.00<br><i>Field max:</i> 5.00       |
| 27.15 | Befindlichkeitsskala anger post-exercise<br><i>Field type:</i> Calculation<br><i>Variable name:</i> BFS_anger_2<br><i>Field required:</i> Not required<br><i>Field min:</i> 1.00<br><i>Field max:</i> 5.00                 |
| 27.16 | Befindlichkeitsskala excitement post-exercise<br><i>Field type:</i> Calculation<br><i>Variable name:</i> BFS_excitement_2<br><i>Field required:</i> Not required<br><i>Field min:</i> 1.00<br><i>Field max:</i> 5.00       |

---

27.17 **If 'Allocation' is equal to 'Aerobic exercise' answer this question:**  SM06  
 SM07  
 V800 Oberwaid

Polar watch used for training  
 SM06: forschung@oberwaid.ch & Tadc93kW  
 SM07: gavin.brupbacher@oberwaid.ch & Loka75zY  
 V800 (Oberwaid) : sport@oberwaid.ch & OberwaidSport

*Field type:* Dropdown  
*Variable name:* Polar\_training  
*Field required:* Required  
*Field min:* 50.00  
*Field max:* 220.00  
*Measurement Unit:* beats per min  
*Option group name:* Polar watch name

27.18 **If 'Allocation' is equal to 'Aerobic exercise' answer this question:**

Watt during intervention  
*Field type:* Numeric field  
*Variable name:* Watt\_intervention  
*Field required:* Required  
*Field min:* 10.00  
*Field max:* 400.00

27.19 **If 'Allocation' is equal to 'Aerobic exercise' answer this question:**

Rate of perceived exertion after 5 min exercise at 80%IAS  
*Field type:* Numeric field  
*Variable name:* RPE\_exercise\_5  
*Field required:* Required  
*Field min:* 6.00  
*Field max:* 20.00

27.20 **If 'Allocation' is equal to 'Aerobic exercise' answer this question:**

Rate of perceived exertion after 15 min exercise at 80%IAS  
*Field type:* Numeric field  
*Variable name:* RPE\_exercise\_15  
*Field required:* Required  
*Field min:* 6.00  
*Field max:* 20.00

27.21 **If 'Allocation' is equal to 'Aerobic exercise' answer this question:**

Rate of perceived exertion after 30 min exercise at 80%IAS  
*Field type:* Numeric field  
*Variable name:* RPE\_exercise\_30  
*Field required:* Required  
*Field min:* 6.00  
*Field max:* 20.00



---

27.22     **If 'Allocation' is equal to 'Aerobic exercise' answer this question:**      beats per min  
Mean heart rate during exercise  
*Field type:* Numeric field  
*Variable name:* HR\_exercise  
*Field required:* Required  
*Field min:* 50.00  
*Field max:* 220.00  
*Measurement Unit:* beats per min

---

27.23     **If 'Allocation' is equal to 'Aerobic exercise' answer this question:**      Yes  
Training\_termination      No  
*Field type:* Radiobutton  
*Variable name:* Training\_termination  
*Field required:* Not required  
*Option group name:* Yes/No

---

27.23.1     **If 'Training\_termination' is equal to 'Yes' answer this question:**       
Reason for training termination  
*Field type:* Multiline Textfield  
*Variable name:* Training\_termination\_reason  
*Field required:* Required

## 28. Follow-up - Polysomnography, sleep assessment 2

| Number | Question                                                                                                                                                                                                                 | Answers                                                                     |
|--------|--------------------------------------------------------------------------------------------------------------------------------------------------------------------------------------------------------------------------|-----------------------------------------------------------------------------|
| 28.1   | Date of followup polysomnography<br><i>Field type:</i> Date<br><i>Variable name:</i> Date_PSG_2<br><i>Field required:</i> Required<br><i>Measurement Unit:</i> min                                                       | <input type="text"/> <input type="text"/> <input type="text"/> (dd-mm-yyyy) |
| 28.2   | Sleep stage artefact duration<br><i>Field type:</i> Numeric field<br><i>Variable name:</i> Sleep_artefact_min_2<br><i>Field required:</i> Required<br><i>Measurement Unit:</i> min                                       | <input type="text"/> min                                                    |
| 28.3   | Sleep stage artefact % total recording time<br><i>Field type:</i> Numeric field<br><i>Variable name:</i> Sleep_artefact_TRT_2<br><i>Field required:</i> Required<br><i>Measurement Unit:</i> %                           | <input type="text"/> %                                                      |
| 28.4   | Total recording time (TRT) night 2<br><i>Field type:</i> Numeric field<br><i>Variable name:</i> TRT_2<br><i>Field required:</i> Required<br><i>Measurement Unit:</i> min                                                 | <input type="text"/> min                                                    |
| 28.5   | Total sleep time (TST) night 2<br><i>Field type:</i> Numeric field<br><i>Variable name:</i> TST_2<br><i>Field required:</i> Required<br><i>Measurement Unit:</i> min                                                     | <input type="text"/> min                                                    |
| 28.6   | Sleep onset latency (SOL) night 2<br><i>Field type:</i> Numeric field<br><i>Variable name:</i> SOL_2<br><i>Field required:</i> Required<br><i>Measurement Unit:</i> min                                                  | <input type="text"/> min                                                    |
| 28.7   | Wake after sleep onset (WASO) night 2<br><i>Field type:</i> Numeric field<br><i>Variable name:</i> WASO_2<br><i>Field required:</i> Required<br><i>Measurement Unit:</i> min                                             | <input type="text"/> min                                                    |
| 28.8   | Number of awakenings (NA) night 2<br><i>Field type:</i> Numeric field<br><i>Variable name:</i> NA_2<br><i>Field required:</i> Required                                                                                   | <input type="text"/>                                                        |
| 28.9   | Sleep efficiency 1 (SE) night 2<br><i>Field type:</i> Numeric field<br><i>Variable name:</i> SE_2<br><i>Field required:</i> Required<br><i>Field min:</i> 0.00<br><i>Field max:</i> 100.00<br><i>Measurement Unit:</i> % | <input type="text"/> %                                                      |

|       |                                                                                                                                                                                                                  |                      |     |
|-------|------------------------------------------------------------------------------------------------------------------------------------------------------------------------------------------------------------------|----------------------|-----|
| 28.10 | Wake min night 2<br><i>Field type:</i> Numeric field<br><i>Variable name:</i> Wake_min_2<br><i>Field required:</i> Required<br><i>Measurement Unit:</i> min                                                      | <input type="text"/> | min |
| 28.11 | Wake %TRT night 2<br><i>Field type:</i> Numeric field<br><i>Variable name:</i> Wake_TRT_2<br><i>Field required:</i> Required<br><i>Field min:</i> 0.00<br><i>Field max:</i> 100.00<br><i>Measurement Unit:</i> % | <input type="text"/> | %   |
| 28.12 | N1 min night 2<br><i>Field type:</i> Numeric field<br><i>Variable name:</i> N1_min_2<br><i>Field required:</i> Required<br><i>Measurement Unit:</i> min                                                          | <input type="text"/> | min |
| 28.13 | N1 %TRT night 2<br><i>Field type:</i> Numeric field<br><i>Variable name:</i> N1_TRT_2<br><i>Field required:</i> Required<br><i>Field min:</i> 0.00<br><i>Field max:</i> 100.00<br><i>Measurement Unit:</i> %     | <input type="text"/> | %   |
| 28.14 | N1 %TST night 2<br><i>Field type:</i> Calculation<br><i>Variable name:</i> N1_TST_2<br><i>Field required:</i> Not required<br><i>Field min:</i> 0.00<br><i>Field max:</i> 100.00<br><i>Measurement Unit:</i> %   |                      |     |
| 28.15 | N2 min night 2<br><i>Field type:</i> Numeric field<br><i>Variable name:</i> N2_min_2<br><i>Field required:</i> Required<br><i>Measurement Unit:</i> min                                                          | <input type="text"/> | min |
| 28.16 | N2 %TRT night 2<br><i>Field type:</i> Numeric field<br><i>Variable name:</i> N2_TRT_2<br><i>Field required:</i> Required<br><i>Field min:</i> 0.00<br><i>Field max:</i> 100.00<br><i>Measurement Unit:</i> %     | <input type="text"/> | %   |
| 28.17 | N2 %TST night 2<br><i>Field type:</i> Calculation<br><i>Variable name:</i> N2_TST_2<br><i>Field required:</i> Not required<br><i>Field min:</i> 0.00<br><i>Field max:</i> 100.00<br><i>Measurement Unit:</i> %   |                      |     |

|       |                                                                                                                                                                                                                                    |                      |     |
|-------|------------------------------------------------------------------------------------------------------------------------------------------------------------------------------------------------------------------------------------|----------------------|-----|
| 28.18 | N3 min night 2<br><i>Field type:</i> Numeric field<br><i>Variable name:</i> N3_min_2<br><i>Field required:</i> Required<br><i>Measurement Unit:</i> min                                                                            | <input type="text"/> | min |
| 28.19 | N3 %TRT night 2<br><i>Field type:</i> Numeric field<br><i>Variable name:</i> N3_TRT_2<br><i>Field required:</i> Required<br><i>Field min:</i> 0.00<br><i>Field max:</i> 100.00<br><i>Measurement Unit:</i> %                       | <input type="text"/> | %   |
| 28.20 | N3 %total sleep time night 2<br><i>Field type:</i> Calculation<br><i>Variable name:</i> N3_TST_2<br><i>Field required:</i> Not required<br><i>Field min:</i> 0.00<br><i>Field max:</i> 100.00<br><i>Measurement Unit:</i> %        |                      |     |
| 28.21 | Light Sleep min night 2<br><i>Field type:</i> Calculation<br><i>Variable name:</i> LS_min_2<br><i>Field required:</i> Not required<br><i>Measurement Unit:</i> min                                                                 |                      |     |
| 28.22 | Light Sleep %TST night 2<br><i>Field type:</i> Calculation<br><i>Variable name:</i> LS_TST_2<br><i>Field required:</i> Not required<br><i>Field min:</i> 0.00<br><i>Field max:</i> 100.00<br><i>Measurement Unit:</i> %            |                      |     |
| 28.23 | Slow wave sleep (SWS) min night 2<br><i>Field type:</i> Numeric field<br><i>Variable name:</i> SWS_min_2<br><i>Field required:</i> Required<br><i>Measurement Unit:</i> min                                                        | <input type="text"/> | min |
| 28.24 | Slow wave sleep (SWS) %TRT night 2<br><i>Field type:</i> Numeric field<br><i>Variable name:</i> SWS_TRT_2<br><i>Field required:</i> Required<br><i>Field min:</i> 0.00<br><i>Field max:</i> 100.00<br><i>Measurement Unit:</i> %   | <input type="text"/> | %   |
| 28.25 | Slow wave sleep (SWS) %TST night 2<br><i>Field type:</i> Calculation<br><i>Variable name:</i> SWS_TST_2<br><i>Field required:</i> Not required<br><i>Field min:</i> 0.00<br><i>Field max:</i> 100.00<br><i>Measurement Unit:</i> % |                      |     |

|       |                                                                                                                                                                                                                                    |                      |     |
|-------|------------------------------------------------------------------------------------------------------------------------------------------------------------------------------------------------------------------------------------|----------------------|-----|
| 28.26 | NREM (non-REM) sleep min night 2<br><i>Field type:</i> Numeric field<br><i>Variable name:</i> NREM_min_2<br><i>Field required:</i> Required<br><i>Measurement Unit:</i> min                                                        | <input type="text"/> | min |
| 28.27 | NREM (non-REM) sleep %TRT night 2<br><i>Field type:</i> Numeric field<br><i>Variable name:</i> NREM_TRT_2<br><i>Field required:</i> Required<br><i>Field min:</i> 0.00<br><i>Field max:</i> 100.00<br><i>Measurement Unit:</i> %   | <input type="text"/> | %   |
| 28.28 | NREM (non-REM) sleep %TST night 2<br><i>Field type:</i> Calculation<br><i>Variable name:</i> NREM_TST_2<br><i>Field required:</i> Not required<br><i>Field min:</i> 0.00<br><i>Field max:</i> 100.00<br><i>Measurement Unit:</i> % |                      |     |
| 28.29 | REM min night 2<br><i>Field type:</i> Numeric field<br><i>Variable name:</i> REM_min_2<br><i>Field required:</i> Required<br><i>Measurement Unit:</i> min                                                                          | <input type="text"/> | min |
| 28.30 | REM %TRT night 2<br><i>Field type:</i> Numeric field<br><i>Variable name:</i> REM_TRT_2<br><i>Field required:</i> Required<br><i>Field min:</i> 0.00<br><i>Field max:</i> 100.00<br><i>Measurement Unit:</i> %                     | <input type="text"/> | %   |
| 28.31 | REM % total sleep time night 2<br><i>Field type:</i> Calculation<br><i>Variable name:</i> REM_TST_2<br><i>Field required:</i> Not required<br><i>Field min:</i> 0.00<br><i>Field max:</i> 100.00<br><i>Measurement Unit:</i> %     |                      |     |
| 28.32 | REMLAT min night 2<br><i>Field type:</i> Numeric field<br><i>Variable name:</i> REMLAT_min_2<br><i>Field required:</i> Required<br><i>Measurement Unit:</i> min                                                                    | <input type="text"/> | min |
| 28.33 | Stage shift index night 2<br><i>Field type:</i> Numeric field<br><i>Variable name:</i> SSI_2<br><i>Field required:</i> Required                                                                                                    | <input type="text"/> |     |
| 28.34 | Oxygen saturation artefact duration during sleep night 2<br><i>Field type:</i> Numeric field<br><i>Variable name:</i> SPO2_artefact_2<br><i>Field required:</i> Required<br><i>Measurement Unit:</i> min                           | <input type="text"/> | min |

|       |                                                                                                                                                                                                                     |                      |      |
|-------|---------------------------------------------------------------------------------------------------------------------------------------------------------------------------------------------------------------------|----------------------|------|
| 28.35 | Oxygen desaturation index from night 2<br><i>Field type:</i> Numeric field<br><i>Variable name:</i> ODI_2<br><i>Field required:</i> Required                                                                        | <input type="text"/> |      |
| 28.36 | Pulse transit time artefact duration during sleep night 2<br><i>Field type:</i> Numeric field<br><i>Variable name:</i> PTT_sleep_artefact_min_2<br><i>Field required:</i> Required<br><i>Measurement Unit:</i> min  | <input type="text"/> | min  |
| 28.37 | Pulse transit time artefact duration during REM night 2<br><i>Field type:</i> Numeric field<br><i>Variable name:</i> PTT_REM_artefact_min_2<br><i>Field required:</i> Required<br><i>Measurement Unit:</i> min      | <input type="text"/> | min  |
| 28.38 | Pulse transit time artefact duration during non-REM night 2<br><i>Field type:</i> Numeric field<br><i>Variable name:</i> PTT_NREM_artefact_min_2<br><i>Field required:</i> Required<br><i>Measurement Unit:</i> min | <input type="text"/> | min  |
| 28.39 | TST mean systolic BP night 2<br><i>Field type:</i> Numeric field<br><i>Variable name:</i> TST_Sys_BP_2<br><i>Field required:</i> Required<br><i>Measurement Unit:</i> mmHg                                          | <input type="text"/> | mmHg |
| 28.40 | TST mean diastolic BP night 2<br><i>Field type:</i> Numeric field<br><i>Variable name:</i> TST_Dia_BP_2<br><i>Field required:</i> Required<br><i>Measurement Unit:</i> mmHg                                         | <input type="text"/> | mmHg |
| 28.41 | NREM mean systolic BP night 2<br><i>Field type:</i> Numeric field<br><i>Variable name:</i> NREM_Sys_BP_2<br><i>Field required:</i> Required<br><i>Measurement Unit:</i> mmHg                                        | <input type="text"/> | mmHg |
| 28.42 | NREM mean diastolic BP night 2<br><i>Field type:</i> Numeric field<br><i>Variable name:</i> NREM_Dia_BP_2<br><i>Field required:</i> Required<br><i>Measurement Unit:</i> mmHg                                       | <input type="text"/> | mmHg |
| 28.43 | REM mean systolic BP night 2<br><i>Field type:</i> Numeric field<br><i>Variable name:</i> REM_Sys_BP_2<br><i>Field required:</i> Required<br><i>Measurement Unit:</i> mmHg                                          | <input type="text"/> | mmHg |
| 28.44 | REM mean diastolic BP night 2<br><i>Field type:</i> Numeric field<br><i>Variable name:</i> REM_Dia_BP_2<br><i>Field required:</i> Required<br><i>Measurement Unit:</i> mmHg                                         | <input type="text"/> | mmHg |

28.45 Mean arterial pressure night 2  
*Field type:* Calculation  
*Variable name:* MAP\_night\_2  
*Field required:* Not required

## 29. Follow-up - Pre sleep HRV, sleep assessment 2

| Number | Question                                                                                                                                                                                                                                 | Answers                                                         |
|--------|------------------------------------------------------------------------------------------------------------------------------------------------------------------------------------------------------------------------------------------|-----------------------------------------------------------------|
| 29.1   | Start and stop time of pre-sleep segment, night 2<br><i>Field type:</i> Textfield<br><i>Variable name:</i> Time_PS_2<br><i>Field required:</i> Required<br><i>Measurement Unit:</i> hh:mm:ss-hh:mm:ss                                    | <input type="text"/> hh:mm:ss-<br><input type="text"/> hh:mm:ss |
| 29.2   | Artefact of pre-sleep segment, night 2<br><i>Field type:</i> Numeric field<br><i>Variable name:</i> Artefact_PS_2<br><i>Field required:</i> Required<br><i>Field min:</i> 0.00<br><i>Field max:</i> 100.00<br><i>Measurement Unit:</i> % | <input type="text"/> %                                          |
| 29.3   | Mean heart rate, Pre-sleep, night 2<br><i>Field type:</i> Numeric field<br><i>Variable name:</i> meanHR_PS_2<br><i>Field required:</i> Required<br><i>Measurement Unit:</i> beats per min                                                | <input type="text"/> beats per min                              |
| 29.4   | RMSSD Pre-sleep HRV night 2<br><i>Field type:</i> Numeric field<br><i>Variable name:</i> RMSSD_PS_2<br><i>Field required:</i> Required<br><i>Measurement Unit:</i> ms                                                                    | <input type="text"/> ms                                         |
| 29.5   | SDNN Pre-sleep HRV night 2<br><i>Field type:</i> Numeric field<br><i>Variable name:</i> SDNN_PS_2<br><i>Field required:</i> Required<br><i>Measurement Unit:</i> ms                                                                      | <input type="text"/> ms                                         |
| 29.6   | Total power, based on Lomb Scargle Periodogram, Pre-sleep, night 2<br><i>Field type:</i> Numeric field<br><i>Variable name:</i> TP_LSP_PS_2<br><i>Field required:</i> Required<br><i>Measurement Unit:</i> Hz                            | <input type="text"/> Hz                                         |
| 29.7   | Low frequency power, based on Lomb Scargle Periodogram, Pre-sleep, night 2<br><i>Field type:</i> Numeric field<br><i>Variable name:</i> LF_LSP_PS_2<br><i>Field required:</i> Required<br><i>Measurement Unit:</i> Hz                    | <input type="text"/> Hz                                         |
| 29.8   | High frequency power, based on Lomb Scargle Periodogram, Pre-sleep, night 2<br><i>Field type:</i> Numeric field<br><i>Variable name:</i> HF_LSP_PS_2<br><i>Field required:</i> Required<br><i>Measurement Unit:</i> Hz                   | <input type="text"/> Hz                                         |



---

|       |                                                                                                                                                                                                                          |                         |
|-------|--------------------------------------------------------------------------------------------------------------------------------------------------------------------------------------------------------------------------|-------------------------|
| 29.9  | LF/HF, based on Lomb Scargle Periodogram, Pre-sleep, night 2<br><i>Field type:</i> Numeric field<br><i>Variable name:</i> LFHF_LSP_PS_2<br><i>Field required:</i> Required                                               | <input type="text"/>    |
| 29.10 | Total power, based on Fast Fourier Transformation, Pre-sleep night 2<br><i>Field type:</i> Numeric field<br><i>Variable name:</i> TP_FFT_PS_2<br><i>Field required:</i> Required<br><i>Measurement Unit:</i> Hz          | <input type="text"/> Hz |
| 29.11 | Low frequency power, based on Fast Fourier Transformation, Pre-sleep night 2<br><i>Field type:</i> Numeric field<br><i>Variable name:</i> LF_FFT_PS_2<br><i>Field required:</i> Required<br><i>Measurement Unit:</i> Hz  | <input type="text"/> Hz |
| 29.12 | High frequency power, based on Fast Fourier Transformation, Pre-sleep night 2<br><i>Field type:</i> Numeric field<br><i>Variable name:</i> HF_FFT_PS_2<br><i>Field required:</i> Required<br><i>Measurement Unit:</i> Hz | <input type="text"/> Hz |
| 29.13 | LF/HF, based on Fast Fourier Transformation, Pre-sleep night 2<br><i>Field type:</i> Numeric field<br><i>Variable name:</i> LFHF_FFT_PS_2<br><i>Field required:</i> Required                                             | <input type="text"/>    |

---

## 30. Follow-up - Nocturnal hour 1 HRV, sleep assessment 2

| Number | Question                                                                                                                                                                                                                                        | Answers                                                         |
|--------|-------------------------------------------------------------------------------------------------------------------------------------------------------------------------------------------------------------------------------------------------|-----------------------------------------------------------------|
| 30.1   | Start and stop time of nocturnal hour 1 segment, night 2<br><i>Field type:</i> Textfield<br><i>Variable name:</i> Time_h1_2<br><i>Field required:</i> Required<br><i>Measurement Unit:</i> hh:mm:ss-hh:mm:ss                                    | <input type="text"/> hh:mm:ss-<br><input type="text"/> hh:mm:ss |
| 30.2   | Artefact of nocturnal hour 1 segment, night 2<br><i>Field type:</i> Numeric field<br><i>Variable name:</i> Artefact_h1_2<br><i>Field required:</i> Required<br><i>Field min:</i> 0.00<br><i>Field max:</i> 100.00<br><i>Measurement Unit:</i> % | <input type="text"/> %                                          |
| 30.3   | Mean heart rate, nocturnal hour 1, night 2<br><i>Field type:</i> Numeric field<br><i>Variable name:</i> meanHR_h1_2<br><i>Field required:</i> Required<br><i>Measurement Unit:</i> beats per min                                                | <input type="text"/> beats per min                              |
| 30.4   | RMSSD, Nocturnal hour 1, night 2<br><i>Field type:</i> Numeric field<br><i>Variable name:</i> RMSSD_h1_2<br><i>Field required:</i> Required<br><i>Measurement Unit:</i> ms                                                                      | <input type="text"/> ms                                         |
| 30.5   | SDNN, Nocturnal hour 1, night 2<br><i>Field type:</i> Numeric field<br><i>Variable name:</i> SDNN_h1_2<br><i>Field required:</i> Required<br><i>Measurement Unit:</i> ms                                                                        | <input type="text"/> ms                                         |
| 30.6   | SDANN, Nocturnal hour 1, night 2<br><i>Field type:</i> Numeric field<br><i>Variable name:</i> SDANN_h1_2<br><i>Field required:</i> Required<br><i>Measurement Unit:</i> ms                                                                      | <input type="text"/> ms                                         |
| 30.7   | Total power, based on Lomb Scargle Periodogram, Nocturnal hour 1, night 2<br><i>Field type:</i> Numeric field<br><i>Variable name:</i> TP_LSP_h1_2<br><i>Field required:</i> Required<br><i>Measurement Unit:</i> Hz                            | <input type="text"/> Hz                                         |
| 30.8   | Low frequency power, based on Lomb Scargle Periodogram, Nocturnal hour 1, night 2<br><i>Field type:</i> Numeric field<br><i>Variable name:</i> LF_LSP_h1_2<br><i>Field required:</i> Required<br><i>Measurement Unit:</i> Hz                    | <input type="text"/> Hz                                         |

|       |                                                                                                                                                                                                                                  |                         |
|-------|----------------------------------------------------------------------------------------------------------------------------------------------------------------------------------------------------------------------------------|-------------------------|
| 30.9  | High frequency power, based on Lomb Scargle Periodogram, Nocturnal hour 1, night 2<br><i>Field type:</i> Numeric field<br><i>Variable name:</i> HF_LSP_h1_2<br><i>Field required:</i> Required<br><i>Measurement Unit:</i> Hz    | <input type="text"/> Hz |
| 30.10 | LF/HF, based on Lomb Scargle Periodogram, Nocturnal hour 1, night 2<br><i>Field type:</i> Numeric field<br><i>Variable name:</i> LFHF_LSP_h1_2<br><i>Field required:</i> Required                                                | <input type="text"/>    |
| 30.11 | Total power, based on Fast Fourier Transformation, Nocturnal hour 1, night 2<br><i>Field type:</i> Numeric field<br><i>Variable name:</i> TP_FFT_h1_2<br><i>Field required:</i> Required<br><i>Measurement Unit:</i> Hz          | <input type="text"/> Hz |
| 30.12 | Low frequency power, based on Fast Fourier Transformation, Nocturnal hour 1, night 1<br><i>Field type:</i> Numeric field<br><i>Variable name:</i> LF_FFT_h1_2<br><i>Field required:</i> Required<br><i>Measurement Unit:</i> Hz  | <input type="text"/> Hz |
| 30.13 | High frequency power, based on Fast Fourier Transformation, Nocturnal hour 1, night 2<br><i>Field type:</i> Numeric field<br><i>Variable name:</i> HF_FFT_h1_2<br><i>Field required:</i> Required<br><i>Measurement Unit:</i> Hz | <input type="text"/> Hz |
| 30.14 | LF/HF, based on Fast Fourier Transformation, Nocturnal hour 1, night 2<br><i>Field type:</i> Numeric field<br><i>Variable name:</i> LFHF_FFT_h1_2<br><i>Field required:</i> Required                                             | <input type="text"/>    |

## 31. Follow-up - Nocturnal hour 2 HRV, sleep assessment 2

| Number | Question                                                                                                                                                                                                                                        | Answers                                                         |
|--------|-------------------------------------------------------------------------------------------------------------------------------------------------------------------------------------------------------------------------------------------------|-----------------------------------------------------------------|
| 31.1   | Start and stop time of nocturnal hour 2 segment, night 2<br><i>Field type:</i> Textfield<br><i>Variable name:</i> Time_h2_2<br><i>Field required:</i> Required<br><i>Measurement Unit:</i> hh:mm:ss-hh:mm:ss                                    | <input type="text"/> hh:mm:ss-<br><input type="text"/> hh:mm:ss |
| 31.2   | Artefact of nocturnal hour 2 segment, night 2<br><i>Field type:</i> Numeric field<br><i>Variable name:</i> Artefact_h2_2<br><i>Field required:</i> Required<br><i>Field min:</i> 0.00<br><i>Field max:</i> 100.00<br><i>Measurement Unit:</i> % | <input type="text"/> %                                          |
| 31.3   | Mean heart rate, nocturnal hour 2, night 2<br><i>Field type:</i> Numeric field<br><i>Variable name:</i> meanHR_h2_2<br><i>Field required:</i> Required<br><i>Measurement Unit:</i> beats per min                                                | <input type="text"/> beats per min                              |
| 31.4   | RMSSD, Nocturnal hour 2, night 2<br><i>Field type:</i> Numeric field<br><i>Variable name:</i> RMSSD_h2_2<br><i>Field required:</i> Required<br><i>Measurement Unit:</i> ms                                                                      | <input type="text"/> ms                                         |
| 31.5   | SDNN, Nocturnal hour 2, night 2<br><i>Field type:</i> Numeric field<br><i>Variable name:</i> SDNN_h2_2<br><i>Field required:</i> Required<br><i>Measurement Unit:</i> ms                                                                        | <input type="text"/> ms                                         |
| 31.6   | SDANN, Nocturnal hour 2, night 2<br><i>Field type:</i> Numeric field<br><i>Variable name:</i> SDANN_h2_2<br><i>Field required:</i> Required<br><i>Measurement Unit:</i> ms                                                                      | <input type="text"/> ms                                         |
| 31.7   | Total power, based on Lomb Scargle Periodogram, Nocturnal hour 2, night 2<br><i>Field type:</i> Numeric field<br><i>Variable name:</i> TP_LSP_h2_2<br><i>Field required:</i> Required<br><i>Measurement Unit:</i> Hz                            | <input type="text"/> Hz                                         |
| 31.8   | Low frequency power, based on Lomb Scargle Periodogram, Nocturnal hour 2, night 2<br><i>Field type:</i> Numeric field<br><i>Variable name:</i> LF_LSP_h2_2<br><i>Field required:</i> Required<br><i>Measurement Unit:</i> Hz                    | <input type="text"/> Hz                                         |

|       |                                                                                                                                                                                                                                  |                      |    |
|-------|----------------------------------------------------------------------------------------------------------------------------------------------------------------------------------------------------------------------------------|----------------------|----|
| 31.9  | High frequency power, based on Lomb Scargle Periodogram, Nocturnal hour 2, night 2<br><i>Field type:</i> Numeric field<br><i>Variable name:</i> HF_LSP_h2_2<br><i>Field required:</i> Required<br><i>Measurement Unit:</i> Hz    | <input type="text"/> | Hz |
| 31.10 | LF/HF, based on Lomb Scargle Periodogram, Nocturnal hour 2, night 2<br><i>Field type:</i> Numeric field<br><i>Variable name:</i> LFHF_LSP_h2_2<br><i>Field required:</i> Required                                                | <input type="text"/> |    |
| 31.11 | Total power, based on Fast Fourier Transformation, Nocturnal hour 2, night 2<br><i>Field type:</i> Numeric field<br><i>Variable name:</i> TP_FFT_h2_2<br><i>Field required:</i> Required<br><i>Measurement Unit:</i> Hz          | <input type="text"/> | Hz |
| 31.12 | Low frequency power, based on Fast Fourier Transformation, Nocturnal hour 2, night 2<br><i>Field type:</i> Numeric field<br><i>Variable name:</i> LF_FFT_h2_2<br><i>Field required:</i> Required<br><i>Measurement Unit:</i> Hz  | <input type="text"/> | Hz |
| 31.13 | High frequency power, based on Fast Fourier Transformation, Nocturnal hour 2, night 2<br><i>Field type:</i> Numeric field<br><i>Variable name:</i> HF_FFT_h2_2<br><i>Field required:</i> Required<br><i>Measurement Unit:</i> Hz | <input type="text"/> | Hz |
| 31.14 | LF/HF, based on Fast Fourier Transformation, Nocturnal hour 2, night 2<br><i>Field type:</i> Numeric field<br><i>Variable name:</i> LFHF_FFT_h2_2<br><i>Field required:</i> Required                                             | <input type="text"/> |    |

## 32. Follow-up - Nocturnal hour 3 HRV, sleep assessment 2

| Number | Question                                                                                                                                                                                                                                        | Answers                                                         |
|--------|-------------------------------------------------------------------------------------------------------------------------------------------------------------------------------------------------------------------------------------------------|-----------------------------------------------------------------|
| 32.1   | Start and stop time of nocturnal hour 3 segment, night 2<br><i>Field type:</i> Textfield<br><i>Variable name:</i> Time_h3_2<br><i>Field required:</i> Required<br><i>Measurement Unit:</i> hh:mm:ss-hh:mm:ss                                    | <input type="text"/> hh:mm:ss-<br><input type="text"/> hh:mm:ss |
| 32.2   | Artefact of nocturnal hour 3 segment, night 2<br><i>Field type:</i> Numeric field<br><i>Variable name:</i> Artefact_h3_2<br><i>Field required:</i> Required<br><i>Field min:</i> 0.00<br><i>Field max:</i> 100.00<br><i>Measurement Unit:</i> % | <input type="text"/> %                                          |
| 32.3   | Mean heart rate, nocturnal hour 3, night 2<br><i>Field type:</i> Numeric field<br><i>Variable name:</i> meanHR_h3_2<br><i>Field required:</i> Required<br><i>Measurement Unit:</i> beats per min                                                | <input type="text"/> beats per min                              |
| 32.4   | RMSSD, Nocturnal hour 3, night 2<br><i>Field type:</i> Numeric field<br><i>Variable name:</i> RMSSD_h3_2<br><i>Field required:</i> Required<br><i>Measurement Unit:</i> ms                                                                      | <input type="text"/> ms                                         |
| 32.5   | SDNN, Nocturnal hour 3, night 2<br><i>Field type:</i> Numeric field<br><i>Variable name:</i> SDNN_h3_2<br><i>Field required:</i> Required<br><i>Measurement Unit:</i> ms                                                                        | <input type="text"/> ms                                         |
| 32.6   | SDANN, Nocturnal hour 3, night 2<br><i>Field type:</i> Numeric field<br><i>Variable name:</i> SDANN_h3_2<br><i>Field required:</i> Required<br><i>Measurement Unit:</i> ms                                                                      | <input type="text"/> ms                                         |
| 32.7   | Total power, based on Lomb Scargle Periodogram, Nocturnal hour 3, night 2<br><i>Field type:</i> Numeric field<br><i>Variable name:</i> TP_LSP_h3_2<br><i>Field required:</i> Required<br><i>Measurement Unit:</i> Hz                            | <input type="text"/> Hz                                         |
| 32.8   | Low frequency power, based on Lomb Scargle Periodogram, Nocturnal hour 3, night 2<br><i>Field type:</i> Numeric field<br><i>Variable name:</i> LF_LSP_h3_2<br><i>Field required:</i> Required<br><i>Measurement Unit:</i> Hz                    | <input type="text"/> Hz                                         |

|       |                                                                                                                                                                                                                                  |                         |
|-------|----------------------------------------------------------------------------------------------------------------------------------------------------------------------------------------------------------------------------------|-------------------------|
| 32.9  | High frequency power, based on Lomb Scargle Periodogram, Nocturnal hour 3, night 2<br><i>Field type:</i> Numeric field<br><i>Variable name:</i> HF_LSP_h3_2<br><i>Field required:</i> Required<br><i>Measurement Unit:</i> Hz    | <input type="text"/> Hz |
| 32.10 | LF/HF, based on Lomb Scargle Periodogram, Nocturnal hour 3, night 2<br><i>Field type:</i> Numeric field<br><i>Variable name:</i> LFHF_LSP_h3_2<br><i>Field required:</i> Required                                                | <input type="text"/>    |
| 32.11 | Total power, based on Fast Fourier Transformation, Nocturnal hour 3, night 2<br><i>Field type:</i> Numeric field<br><i>Variable name:</i> TP_FFT_h3_2<br><i>Field required:</i> Required<br><i>Measurement Unit:</i> Hz          | <input type="text"/> Hz |
| 32.12 | Low frequency power, based on Fast Fourier Transformation, Nocturnal hour 3, night 2<br><i>Field type:</i> Numeric field<br><i>Variable name:</i> LF_FFT_h3_2<br><i>Field required:</i> Required<br><i>Measurement Unit:</i> Hz  | <input type="text"/> Hz |
| 32.13 | High frequency power, based on Fast Fourier Transformation, Nocturnal hour 3, night 2<br><i>Field type:</i> Numeric field<br><i>Variable name:</i> HF_FFT_h3_2<br><i>Field required:</i> Required<br><i>Measurement Unit:</i> Hz | <input type="text"/> Hz |
| 32.14 | LF/HF, based on Fast Fourier Transformation, Nocturnal hour 3, night 2<br><i>Field type:</i> Numeric field<br><i>Variable name:</i> LFHF_FFT_h3_2<br><i>Field required:</i> Required                                             | <input type="text"/>    |

### 33. Follow-up - Nocturnal hour 4 HRV, sleep assessment 2

| Number | Question                                                                                                                                                                                                                                        | Answers                                                         |
|--------|-------------------------------------------------------------------------------------------------------------------------------------------------------------------------------------------------------------------------------------------------|-----------------------------------------------------------------|
| 33.1   | Start and stop time of nocturnal hour 4 segment, night 2<br><i>Field type:</i> Textfield<br><i>Variable name:</i> Time_h4_2<br><i>Field required:</i> Required<br><i>Measurement Unit:</i> hh:mm:ss-hh:mm:ss                                    | <input type="text"/> hh:mm:ss-<br><input type="text"/> hh:mm:ss |
| 33.2   | Artefact of nocturnal hour 4 segment, night 2<br><i>Field type:</i> Numeric field<br><i>Variable name:</i> Artefact_h4_2<br><i>Field required:</i> Required<br><i>Field min:</i> 0.00<br><i>Field max:</i> 100.00<br><i>Measurement Unit:</i> % | <input type="text"/> %                                          |
| 33.3   | Mean heart rate, nocturnal hour 4, night 2<br><i>Field type:</i> Numeric field<br><i>Variable name:</i> meanHR_h4_2<br><i>Field required:</i> Required<br><i>Measurement Unit:</i> beats per min                                                | <input type="text"/> beats per min                              |
| 33.4   | RMSSD, Nocturnal hour 4, night 2<br><i>Field type:</i> Numeric field<br><i>Variable name:</i> RMSSD_h4_2<br><i>Field required:</i> Required<br><i>Measurement Unit:</i> ms                                                                      | <input type="text"/> ms                                         |
| 33.5   | SDNN, Nocturnal hour 4, night 2<br><i>Field type:</i> Numeric field<br><i>Variable name:</i> SDNN_h4_2<br><i>Field required:</i> Required<br><i>Measurement Unit:</i> ms                                                                        | <input type="text"/> ms                                         |
| 33.6   | SDANN, Nocturnal hour 4, night 2<br><i>Field type:</i> Numeric field<br><i>Variable name:</i> SDANN_h4_2<br><i>Field required:</i> Required<br><i>Measurement Unit:</i> ms                                                                      | <input type="text"/> ms                                         |
| 33.7   | Total power, based on Lomb Scargle Periodogram, Nocturnal hour 4, night 2<br><i>Field type:</i> Numeric field<br><i>Variable name:</i> TP_LSP_h4_2<br><i>Field required:</i> Required<br><i>Measurement Unit:</i> Hz                            | <input type="text"/> Hz                                         |
| 33.8   | Low frequency power, based on Lomb Scargle Periodogram, Nocturnal hour 4, night 2<br><i>Field type:</i> Numeric field<br><i>Variable name:</i> LF_LSP_h4_2<br><i>Field required:</i> Required<br><i>Measurement Unit:</i> Hz                    | <input type="text"/> Hz                                         |



|       |                                                                                                                                                                                                                                  |                         |
|-------|----------------------------------------------------------------------------------------------------------------------------------------------------------------------------------------------------------------------------------|-------------------------|
| 33.9  | High frequency power, based on Lomb Scargle Periodogram, Nocturnal hour 4, night 2<br><i>Field type:</i> Numeric field<br><i>Variable name:</i> HF_LSP_h4_2<br><i>Field required:</i> Required<br><i>Measurement Unit:</i> Hz    | <input type="text"/> Hz |
| 33.10 | LF/HF, based on Lomb Scargle Periodogram, Nocturnal hour 4, night 2<br><i>Field type:</i> Numeric field<br><i>Variable name:</i> LFHF_LSP_h4_2<br><i>Field required:</i> Required                                                | <input type="text"/>    |
| 33.11 | Total power, based on Fast Fourier Transformation, Nocturnal hour 4, night 2<br><i>Field type:</i> Numeric field<br><i>Variable name:</i> TP_FFT_h4_2<br><i>Field required:</i> Required<br><i>Measurement Unit:</i> Hz          | <input type="text"/> Hz |
| 33.12 | Low frequency power, based on Fast Fourier Transformation, Nocturnal hour 4, night 2<br><i>Field type:</i> Numeric field<br><i>Variable name:</i> LF_FFT_h4_2<br><i>Field required:</i> Required<br><i>Measurement Unit:</i> Hz  | <input type="text"/> Hz |
| 33.13 | High frequency power, based on Fast Fourier Transformation, Nocturnal hour 4, night 2<br><i>Field type:</i> Numeric field<br><i>Variable name:</i> HF_FFT_h4_2<br><i>Field required:</i> Required<br><i>Measurement Unit:</i> Hz | <input type="text"/> Hz |
| 33.14 | LF/HF, based on Fast Fourier Transformation, Nocturnal hour 4, night 2<br><i>Field type:</i> Numeric field<br><i>Variable name:</i> LFHF_FFT_h4_2<br><i>Field required:</i> Required                                             | <input type="text"/>    |

## 34. Follow-up - Nocturnal hour 5 HRV, sleep assessment 2

| Number | Question                                                                                                                                                                                                                                        | Answers                                                         |
|--------|-------------------------------------------------------------------------------------------------------------------------------------------------------------------------------------------------------------------------------------------------|-----------------------------------------------------------------|
| 34.1   | Start and stop time of nocturnal hour 5 segment, night 2<br><i>Field type:</i> Textfield<br><i>Variable name:</i> Time_h5_2<br><i>Field required:</i> Required<br><i>Measurement Unit:</i> hh:mm:ss-hh:mm:ss                                    | <input type="text"/> hh:mm:ss-<br><input type="text"/> hh:mm:ss |
| 34.2   | Artefact of nocturnal hour 5 segment, night 2<br><i>Field type:</i> Numeric field<br><i>Variable name:</i> Artefact_h5_2<br><i>Field required:</i> Required<br><i>Field min:</i> 0.00<br><i>Field max:</i> 100.00<br><i>Measurement Unit:</i> % | <input type="text"/> %                                          |
| 34.3   | Mean heart rate, nocturnal hour 5, night 2<br><i>Field type:</i> Numeric field<br><i>Variable name:</i> meanHR_h5_2<br><i>Field required:</i> Required<br><i>Measurement Unit:</i> beats per min                                                | <input type="text"/> beats per min                              |
| 34.4   | RMSSD, Nocturnal hour 5, night 2<br><i>Field type:</i> Numeric field<br><i>Variable name:</i> RMSSD_h5_2<br><i>Field required:</i> Required<br><i>Measurement Unit:</i> ms                                                                      | <input type="text"/> ms                                         |
| 34.5   | SDNN, Nocturnal hour 5, night 2<br><i>Field type:</i> Numeric field<br><i>Variable name:</i> SDNN_h5_2<br><i>Field required:</i> Required<br><i>Measurement Unit:</i> ms                                                                        | <input type="text"/> ms                                         |
| 34.6   | SDANN, Nocturnal hour 5, night 2<br><i>Field type:</i> Numeric field<br><i>Variable name:</i> SDANN_h5_2<br><i>Field required:</i> Required<br><i>Measurement Unit:</i> ms                                                                      | <input type="text"/> ms                                         |
| 34.7   | Total power, based on Lomb Scargle Periodogram, Nocturnal hour 5, night 2<br><i>Field type:</i> Numeric field<br><i>Variable name:</i> TP_LSP_h5_2<br><i>Field required:</i> Required<br><i>Measurement Unit:</i> Hz                            | <input type="text"/> Hz                                         |
| 34.8   | Low frequency power, based on Lomb Scargle Periodogram, Nocturnal hour 5, night 2<br><i>Field type:</i> Numeric field<br><i>Variable name:</i> LF_LSP_h5_2<br><i>Field required:</i> Required<br><i>Measurement Unit:</i> Hz                    | <input type="text"/> Hz                                         |

|       |                                                                                                                                                                                                                                  |                      |    |
|-------|----------------------------------------------------------------------------------------------------------------------------------------------------------------------------------------------------------------------------------|----------------------|----|
| 34.9  | High frequency power, based on Lomb Scargle Periodogram, Nocturnal hour 5, night 2<br><i>Field type:</i> Numeric field<br><i>Variable name:</i> HF_LSP_h5_2<br><i>Field required:</i> Required<br><i>Measurement Unit:</i> Hz    | <input type="text"/> | Hz |
| 34.10 | LF/HF, based on Lomb Scargle Periodogram, Nocturnal hour 5, night 2<br><i>Field type:</i> Numeric field<br><i>Variable name:</i> LFHF_LSP_h5_2<br><i>Field required:</i> Required                                                | <input type="text"/> |    |
| 34.11 | Total power, based on Fast Fourier Transformation, Nocturnal hour 5, night 2<br><i>Field type:</i> Numeric field<br><i>Variable name:</i> TP_FFT_h5_2<br><i>Field required:</i> Required<br><i>Measurement Unit:</i> Hz          | <input type="text"/> | Hz |
| 34.12 | Low frequency power, based on Fast Fourier Transformation, Nocturnal hour 5, night 2<br><i>Field type:</i> Numeric field<br><i>Variable name:</i> LF_FFT_h5_2<br><i>Field required:</i> Required<br><i>Measurement Unit:</i> Hz  | <input type="text"/> | Hz |
| 34.13 | High frequency power, based on Fast Fourier Transformation, Nocturnal hour 5, night 2<br><i>Field type:</i> Numeric field<br><i>Variable name:</i> HF_FFT_h5_2<br><i>Field required:</i> Required<br><i>Measurement Unit:</i> Hz | <input type="text"/> | Hz |
| 34.14 | LF/HF, based on Fast Fourier Transformation, Nocturnal hour 5, night 2<br><i>Field type:</i> Numeric field<br><i>Variable name:</i> LFHF_FFT_h5_2<br><i>Field required:</i> Required                                             | <input type="text"/> |    |

## 35. Follow-up - Nocturnal hour 6 HRV, sleep assessment 2

| Number | Question                                                                                                                                                                                                                                        | Answers                                                         |
|--------|-------------------------------------------------------------------------------------------------------------------------------------------------------------------------------------------------------------------------------------------------|-----------------------------------------------------------------|
| 35.1   | Start and stop time of nocturnal hour 6 segment, night 2<br><i>Field type:</i> Textfield<br><i>Variable name:</i> Time_h6_2<br><i>Field required:</i> Required<br><i>Measurement Unit:</i> hh:mm:ss-hh:mm:ss                                    | <input type="text"/> hh:mm:ss-<br><input type="text"/> hh:mm:ss |
| 35.2   | Artefact of nocturnal hour 6 segment, night 2<br><i>Field type:</i> Numeric field<br><i>Variable name:</i> Artefact_h6_2<br><i>Field required:</i> Required<br><i>Field min:</i> 0.00<br><i>Field max:</i> 100.00<br><i>Measurement Unit:</i> % | <input type="text"/> %                                          |
| 35.3   | Mean heart rate, nocturnal hour 6, night 2<br><i>Field type:</i> Numeric field<br><i>Variable name:</i> meanHR_h6_2<br><i>Field required:</i> Required<br><i>Measurement Unit:</i> beats per min                                                | <input type="text"/> beats per min                              |
| 35.4   | RMSSD, Nocturnal hour 6, night 2<br><i>Field type:</i> Numeric field<br><i>Variable name:</i> RMSSD_h6_2<br><i>Field required:</i> Required<br><i>Measurement Unit:</i> ms                                                                      | <input type="text"/> ms                                         |
| 35.5   | SDNN, Nocturnal hour 6, night 2<br><i>Field type:</i> Numeric field<br><i>Variable name:</i> SDNN_h6_2<br><i>Field required:</i> Required<br><i>Measurement Unit:</i> ms                                                                        | <input type="text"/> ms                                         |
| 35.6   | SDANN, Nocturnal hour 6, night 2<br><i>Field type:</i> Numeric field<br><i>Variable name:</i> SDANN_h6_2<br><i>Field required:</i> Required<br><i>Measurement Unit:</i> ms                                                                      | <input type="text"/> ms                                         |
| 35.7   | Total power, based on Lomb Scargle Periodogram, Nocturnal hour 6, night 2<br><i>Field type:</i> Numeric field<br><i>Variable name:</i> TP_LSP_h6_2<br><i>Field required:</i> Required<br><i>Measurement Unit:</i> Hz                            | <input type="text"/> Hz                                         |
| 35.8   | Low frequency power, based on Lomb Scargle Periodogram, Nocturnal hour 6, night 2<br><i>Field type:</i> Numeric field<br><i>Variable name:</i> LF_LSP_h6_2<br><i>Field required:</i> Required<br><i>Measurement Unit:</i> Hz                    | <input type="text"/> Hz                                         |

---

|       |                                                                                                                                                                                                                                  |                         |
|-------|----------------------------------------------------------------------------------------------------------------------------------------------------------------------------------------------------------------------------------|-------------------------|
| 35.9  | High frequency power, based on Lomb Scargle Periodogram, Nocturnal hour 6, night 2<br><i>Field type:</i> Numeric field<br><i>Variable name:</i> HF_LSP_h6_2<br><i>Field required:</i> Required<br><i>Measurement Unit:</i> Hz    | <input type="text"/> Hz |
| 35.10 | LF/HF, based on Lomb Scargle Periodogram, Nocturnal hour 6, night 2<br><i>Field type:</i> Numeric field<br><i>Variable name:</i> LFHF_LSP_h6_2<br><i>Field required:</i> Required                                                | <input type="text"/>    |
| 35.11 | Total power, based on Fast Fourier Transformation, Nocturnal hour 6, night 2<br><i>Field type:</i> Numeric field<br><i>Variable name:</i> TP_FFT_h6_2<br><i>Field required:</i> Required<br><i>Measurement Unit:</i> Hz          | <input type="text"/> Hz |
| 35.12 | Low frequency power, based on Fast Fourier Transformation, Nocturnal hour 6, night 2<br><i>Field type:</i> Numeric field<br><i>Variable name:</i> LF_FFT_h6_2<br><i>Field required:</i> Required<br><i>Measurement Unit:</i> Hz  | <input type="text"/> Hz |
| 35.13 | High frequency power, based on Fast Fourier Transformation, Nocturnal hour 6, night 2<br><i>Field type:</i> Numeric field<br><i>Variable name:</i> HF_FFT_h6_2<br><i>Field required:</i> Required<br><i>Measurement Unit:</i> Hz | <input type="text"/> Hz |
| 35.14 | LF/HF, based on Fast Fourier Transformation, Nocturnal hour 6, night 2<br><i>Field type:</i> Numeric field<br><i>Variable name:</i> LFHF_FFT_h6_2<br><i>Field required:</i> Required                                             | <input type="text"/>    |

---

## 36. Follow-up - Morning HRV, sleep assessment 2

| Number | Question                                                                                                                                                                                                                              | Answers                                                         |
|--------|---------------------------------------------------------------------------------------------------------------------------------------------------------------------------------------------------------------------------------------|-----------------------------------------------------------------|
| 36.1   | Start and stop time of morning segment, night 2<br><i>Field type:</i> Textfield<br><i>Variable name:</i> Time_m_2<br><i>Field required:</i> Required<br><i>Measurement Unit:</i> hh:mm:ss-hh:mm:ss                                    | <input type="text"/> hh:mm:ss-<br><input type="text"/> hh:mm:ss |
| 36.2   | Artefact of morning segment, night 2<br><i>Field type:</i> Numeric field<br><i>Variable name:</i> Artefact_m_2<br><i>Field required:</i> Required<br><i>Field min:</i> 0.00<br><i>Field max:</i> 100.00<br><i>Measurement Unit:</i> % | <input type="text"/> %                                          |
| 36.3   | Mean heart rate, morning, night 2<br><i>Field type:</i> Numeric field<br><i>Variable name:</i> meanHR_m_2<br><i>Field required:</i> Required<br><i>Measurement Unit:</i> beats per min                                                | <input type="text"/> beats per min                              |
| 36.4   | RMSSD morning HRV night 2<br><i>Field type:</i> Numeric field<br><i>Variable name:</i> RMSSD_m_2<br><i>Field required:</i> Required<br><i>Measurement Unit:</i> ms                                                                    | <input type="text"/> ms                                         |
| 36.5   | SDNN morning HRV night 2<br><i>Field type:</i> Numeric field<br><i>Variable name:</i> SDNN_m_2<br><i>Field required:</i> Required<br><i>Measurement Unit:</i> ms                                                                      | <input type="text"/> ms                                         |
| 36.6   | Total power, based on Lomb Scargle Periodogram, morning, night 2<br><i>Field type:</i> Numeric field<br><i>Variable name:</i> TP_LSP_m_2<br><i>Field required:</i> Required<br><i>Measurement Unit:</i> Hz                            | <input type="text"/> Hz                                         |
| 36.7   | Low frequency power, based on Lomb Scargle Periodogram, morning, night 2<br><i>Field type:</i> Numeric field<br><i>Variable name:</i> LF_LSP_m_2<br><i>Field required:</i> Required<br><i>Measurement Unit:</i> Hz                    | <input type="text"/> Hz                                         |
| 36.8   | High frequency power, based on Lomb Scargle Periodogram, morning, night 2<br><i>Field type:</i> Numeric field<br><i>Variable name:</i> HF_LSP_m_2<br><i>Field required:</i> Required<br><i>Measurement Unit:</i> Hz                   | <input type="text"/> Hz                                         |

---

|       |                                                                                                                                                                                                                        |                         |
|-------|------------------------------------------------------------------------------------------------------------------------------------------------------------------------------------------------------------------------|-------------------------|
| 36.9  | LF/HF, based on Lomb Scargle Periodogram, morning, night 2<br><i>Field type:</i> Numeric field<br><i>Variable name:</i> LFHF_LSP_m_2<br><i>Field required:</i> Required                                                | <input type="text"/>    |
| 36.10 | Total power, based on Fast Fourier Transformation, morning, night 2<br><i>Field type:</i> Numeric field<br><i>Variable name:</i> TP_FFT_m_2<br><i>Field required:</i> Required<br><i>Measurement Unit:</i> Hz          | <input type="text"/> Hz |
| 36.11 | Low frequency power, based on Fast Fourier Transformation, morning, night 2<br><i>Field type:</i> Numeric field<br><i>Variable name:</i> LF_FFT_m_2<br><i>Field required:</i> Required<br><i>Measurement Unit:</i> Hz  | <input type="text"/> Hz |
| 36.12 | High frequency power, based on Fast Fourier Transformation, morning, night 2<br><i>Field type:</i> Numeric field<br><i>Variable name:</i> HF_FFT_m_2<br><i>Field required:</i> Required<br><i>Measurement Unit:</i> Hz | <input type="text"/> Hz |
| 36.13 | LF/HF, based on Fast Fourier Transformation, morning, night 2<br><i>Field type:</i> Numeric field<br><i>Variable name:</i> LFHF_FFT_m_2<br><i>Field required:</i> Required                                             | <input type="text"/>    |

---

## 37. Follow-up - Pre-sleep arousal scale

| Number | Question                                                                                                                                                                                 | Answers |
|--------|------------------------------------------------------------------------------------------------------------------------------------------------------------------------------------------|---------|
| 37.1   | PSAS somatic night 2<br><i>Field type:</i> Calculation<br><i>Variable name:</i> PSAS_som_2<br><i>Field required:</i> Not required<br><i>Field min:</i> 8.00<br><i>Field max:</i> 40.00   |         |
| 37.2   | PSAS cognitive night 2<br><i>Field type:</i> Calculation<br><i>Variable name:</i> PSAS_cog_2<br><i>Field required:</i> Not required<br><i>Field min:</i> 7.00<br><i>Field max:</i> 35.00 |         |



## 38. Follow-up - Schlafragebogen A follow-up

| Number | Question                                                                                                                                                                                                                               | Answers |
|--------|----------------------------------------------------------------------------------------------------------------------------------------------------------------------------------------------------------------------------------------|---------|
| 38.1   | Schlafragebogen A 23d night 2<br><i>Field type:</i> Calculation<br><i>Variable name:</i> SFA_23d_2<br><i>Field required:</i> Not required<br><i>Field min:</i> 1.00<br><i>Field max:</i> 5.00                                          |         |
| 38.2   | Schlafragebogen A Allgemeine Schlafcharakterisierung night 2<br><i>Field type:</i> Calculation<br><i>Variable name:</i> SFA_ASC_2<br><i>Field required:</i> Not required                                                               |         |
| 38.3   | Schlafragebogen A Vorzeitiges Aufwachen night 2<br><i>Field type:</i> Calculation<br><i>Variable name:</i> SFA_VZA_2<br><i>Field required:</i> Not required                                                                            |         |
| 38.4   | Schlafragebogen A Durchschlafschwierigkeiten night 2<br><i>Field type:</i> Calculation<br><i>Variable name:</i> SFA_DSS_2<br><i>Field required:</i> Not required                                                                       |         |
| 38.5   | Schlafragebogen A Einschlafschwierigkeiten night 2<br><i>Field type:</i> Calculation<br><i>Variable name:</i> SFA_ESS_2<br><i>Field required:</i> Not required                                                                         |         |
| 38.6   | Schlafragebogen A Schlafqualität night 2<br><i>Field type:</i> Calculation<br><i>Variable name:</i> SFA_SQ_2<br><i>Field required:</i> Not required<br><i>Field min:</i> 1.00<br><i>Field max:</i> 5.00                                |         |
| 38.7   | Schlafragebogen A Gefühl des Erholtseins nach dem Schlaf night 2<br><i>Field type:</i> Calculation<br><i>Variable name:</i> SFA_GES_2<br><i>Field required:</i> Not required<br><i>Field min:</i> 1.00<br><i>Field max:</i> 5.00       |         |
| 38.8   | Schlafragebogen A Psychomotorische Symptome in der Schlafphase night 2<br><i>Field type:</i> Calculation<br><i>Variable name:</i> SFA_PSS_2<br><i>Field required:</i> Not required<br><i>Field min:</i> 1.00<br><i>Field max:</i> 5.00 |         |

---

38.9      Schlafragebogen A Gesamtschlafdauer (Stunden) night 2  
*Field type:* Calculation  
*Variable name:* SFA\_GSD\_2  
*Field required:* Not required  
*Field min:* 1.00  
*Field max:* 5.00

---

38.10     Schlafragebogen A Psychische Ausgeglichenheit vor dem  
Schlafengehen night 2  
*Field type:* Calculation  
*Variable name:* SFA\_PSYA\_2  
*Field required:* Not required  
*Field min:* 1.00  
*Field max:* 5.00

---

38.11     Schlafragebogen A Psychisches Erschöpftsein vor dem  
Schlafengehen night 2  
*Field type:* Calculation  
*Variable name:* SFA\_PSYE\_2  
*Field required:* Not required  
*Field min:* 1.00  
*Field max:* 5.00

## 39. Day 5 - Daytime sleepiness 0800 hrs

| Number | Question                                                                                                                                  | Answers |
|--------|-------------------------------------------------------------------------------------------------------------------------------------------|---------|
| 39.1   | Daytime sleepiness 0800 hrs<br><i>Field type:</i> Calculation<br><i>Variable name:</i> SSS_0800hrs<br><i>Field required:</i> Not required |         |

## 40. Day 5 - Daytime sleepiness 1200 hrs

| Number | Question                                                                                                                                  | Answers |
|--------|-------------------------------------------------------------------------------------------------------------------------------------------|---------|
| 40.1   | Daytime sleepiness 1200 hrs<br><i>Field type:</i> Calculation<br><i>Variable name:</i> SSS_1200hrs<br><i>Field required:</i> Not required |         |

# 41. Day 5 - Daytime sleepiness 1600 hrs

| Number | Question                                                                                                                                  | Answers |
|--------|-------------------------------------------------------------------------------------------------------------------------------------------|---------|
| 41.1   | Daytime sleepiness 1600 hrs<br><i>Field type:</i> Calculation<br><i>Variable name:</i> SSS_1600hrs<br><i>Field required:</i> Not required |         |

## 42. Day 5 - Daytime sleepiness 2000 hrs

| Number | Question                                                                                                                                                                              | Answers                                                                                                                                                                                                                                                                                                                                                                                                                                                                                                                                                                                                                                                                              |
|--------|---------------------------------------------------------------------------------------------------------------------------------------------------------------------------------------|--------------------------------------------------------------------------------------------------------------------------------------------------------------------------------------------------------------------------------------------------------------------------------------------------------------------------------------------------------------------------------------------------------------------------------------------------------------------------------------------------------------------------------------------------------------------------------------------------------------------------------------------------------------------------------------|
| 42.1   | <p>Daytime sleepiness 2000 hrs<br/><i>Field type:</i> Radiobutton<br/><i>Variable name:</i> SSS_2000hrs<br/><i>Field required:</i> Not required<br/><i>Option group name:</i> SSS</p> | <ul style="list-style-type: none"><li><input type="radio"/> Fühle mich aktiv und vital; vollkommen wach</li><li><input type="radio"/> Bin voll da, jedoch nicht auf den Höhepunkt; kann mich konzentrieren</li><li><input type="radio"/> Entspannt; wach; nicht voll aufmerksam, ansprechbar</li><li><input type="radio"/> Etwas dösig; nicht auf dem Höhepunkt; etwas schlapp</li><li><input type="radio"/> Dösig; verliere das Interesse, wach zu bleiben; verlangsamt</li><li><input type="radio"/> Schläfrig; möchte mich hinlegen; kämpfe gegen den Schlaf; benebelt</li><li><input type="radio"/> Fast träumend; schlafe bald ein; kein Bemühen mehr, wach zu bleibe</li></ul> |

## 43. Days 3-5 - Adherence

| Number | Question                                                                                                                                                                                                                                                                                                                                                                                    | Answers                                                                                               |
|--------|---------------------------------------------------------------------------------------------------------------------------------------------------------------------------------------------------------------------------------------------------------------------------------------------------------------------------------------------------------------------------------------------|-------------------------------------------------------------------------------------------------------|
| 43.1   | <p>Name of vivofit wristband</p> <p>SM02: mobigame2016@gmail.com &amp; Mobigame_SM02</p> <p>SM03: mobigamesm03@gmail.com &amp; Mobigame_SM03</p> <p>SM01 (nur in Reserve): mobigamesm01@gmail.com &amp; Mobigame_SM01</p> <p><i>Field type:</i> Dropdown</p> <p><i>Variable name:</i> Vivofit_name</p> <p><i>Field required:</i> Required</p> <p><i>Option group name:</i> Vivofit name</p> | <p><input type="radio"/> SM01</p> <p><input type="radio"/> SM02</p> <p><input type="radio"/> SM03</p> |
| 43.2   | <p>Steps on day 3</p> <p><i>Field type:</i> Numeric field</p> <p><i>Variable name:</i> Steps_day3</p> <p><i>Field required:</i> Required</p>                                                                                                                                                                                                                                                | <input type="text"/>                                                                                  |
| 43.3   | <p>Steps on day 4</p> <p><i>Field type:</i> Numeric field</p> <p><i>Variable name:</i> Steps_day4</p> <p><i>Field required:</i> Required</p>                                                                                                                                                                                                                                                | <input type="text"/>                                                                                  |
| 43.4   | <p>Steps on day 5</p> <p><i>Field type:</i> Numeric field</p> <p><i>Variable name:</i> Steps_day5</p> <p><i>Field required:</i> Required</p>                                                                                                                                                                                                                                                | <input type="text"/>                                                                                  |

## 44. Any point during trial - Retention

| Number | Question                                                                                                                                                                                                                                       | Answers                                                                             |
|--------|------------------------------------------------------------------------------------------------------------------------------------------------------------------------------------------------------------------------------------------------|-------------------------------------------------------------------------------------|
| 44.1   | Dropout of patient<br><i>Field type:</i> Radiobutton<br><i>Variable name:</i> Patient_dropout<br><i>Field required:</i> Not required<br><i>Option group name:</i> Yes/No                                                                       | <input type="radio"/> Yes<br><input type="radio"/> No                               |
| 44.1.1 | <b><i>If 'Dropout of patient' is equal to 'Yes' answer this question:</i></b><br>Patient's reason for dropout<br><i>Field type:</i> Multiline Textfield<br><i>Variable name:</i> Patient_dropout_reason<br><i>Field required:</i> Not required |   |
| 44.2   | Withdrawal from PI<br><i>Field type:</i> Radiobutton<br><i>Variable name:</i> PI_withdrew<br><i>Field required:</i> Not required<br><i>Option group name:</i> Yes/No                                                                           | <input type="radio"/> Yes<br><input type="radio"/> No                               |
| 44.2.1 | <b><i>If 'Withdrawal from PI' is equal to 'Yes' answer this question:</i></b><br>PI's reason for withdrawal<br><i>Field type:</i> Multiline Textfield<br><i>Variable name:</i> PI_withdrawal_reason<br><i>Field required:</i> Not required     |  |



## 45. Any point during trial - Serious Adverse Event

| Number | Question                                                                                                                      | Answers |
|--------|-------------------------------------------------------------------------------------------------------------------------------|---------|
| 45.1   | Serious Adverse Event<br><i>Field type:</i> Add report button<br><i>Variable name:</i><br><i>Field required:</i> Not required |         |
